# Supplementary material
Source: ML conference proceedings conference paper supplement (https://openreview.net/forum?id=VUbwLjLkws)
Supplement: supplementary_material [file full-paper-with-appendix.pdf › full-paper-with-appendix.pdf]

---

# Scaling Laws for Gradient Descent and Sign Descent for Linear Bigram Models under Zipf’s Law

---

Anonymous Author(s)

Affiliation

Address

email

## Abstract

Recent works have highlighted optimization difficulties faced by gradient descent in training the first and last layers of transformer-based language models, which are overcome by optimizers such as Adam. These works suggest that the difficulty is linked to the heavy-tailed distribution of words in text data, where the frequency of the  $k$ th most frequent word  $\pi_k$  is proportional to  $1/k$ , following Zipf’s law. To better understand the impact of the data distribution on training performance, we study a linear bigram model for next-token prediction when the tokens follow a power law  $\pi_k \propto 1/k^\alpha$  parameterized by the exponent  $\alpha > 0$ . We derive optimization scaling laws for deterministic gradient descent and sign descent as a proxy for Adam as a function of the exponent  $\alpha$ . Existing theoretical investigations in scaling laws assume that the eigenvalues of the data decay as a power law with exponent  $\alpha > 1$ . This assumption effectively makes the problem “finite dimensional” as most of the loss comes from a few of the largest eigencomponents. In comparison, we show that the problem is more difficult when the data have heavier tails. The case  $\alpha = 1$  as found in text data is “worst-case” for gradient descent, in that the number of iterations required to reach a small relative error scales almost linearly with dimension. While the performance of sign descent also depends on the dimension, for Zipf-distributed data the number of iterations scales only with the square-root of the dimension, leading to a large improvement for large vocabularies.

## 1 Introduction

Recent works have shown that one of the primary benefits of Adam (Kingma and Ba, 2015) in training transformed-based language models (Vaswani et al., 2017) lies in how it handles the first and last layers (Zhang et al., 2025; Zhao et al., 2025). For language models, the input and output dimensions correspond to distinct words in the vocabulary, where the  $k$ th most frequent word has frequency  $\pi_k \propto 1/k$  following Zipf’s law (Piantadosi, 2014). Kunstner et al. (2024) provide evidence that this heavy-tailed distribution leads to optimization difficulties for gradient descent that Adam is able to overcome. They argue that Zipf’s law is “worst-case” in that it combines a large imbalance in frequencies, while decaying slowly enough that most samples come from the tail.

Our objective is to formalize this empirical observation, and to describe the impact of the heavy-tailedness of the data distribution on the convergence of gradient descent (GD) and sign descent (SD) as a proxy for Adam (Tieleman and Hinton, 2012; Bernstein et al., 2018; Balles et al., 2020; Chen et al., 2023). We consider a linear bigram model for next-token prediction trained with the square loss, where the token frequencies  $\pi_k$  follow a power law  $\pi_k \propto 1/k^\alpha$  with exponent  $\alpha > 0$ . While this problem would be solved directly rather than with iterative methods, it is a good starting point for the theoretical investigation of optimization dynamics. Despite its apparent simplicity, this model already reproduces the observation that GD performs poorly on Zipf-distributed data (see Fig. 1). The behavior of gradient and sign descent are also not well described by current results, see Section 1.3.

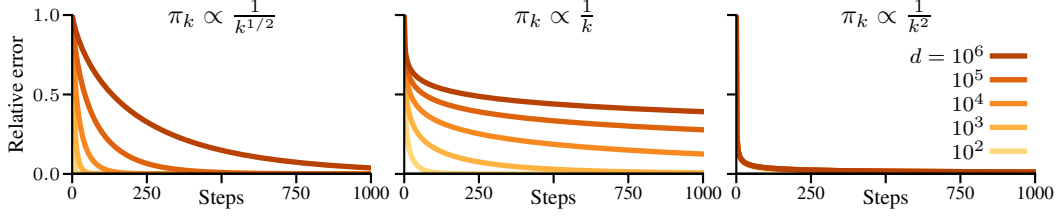

Figure 1: **Gradient descent (GD) scales badly with vocabulary size when the data is Zipfian.** Relative error on a linear bigram problem with squared loss trained with GD with vocabulary size  $d$  when the word class frequencies follow  $\pi_k \propto 1/k^\alpha$ . For  $\alpha \leq 1$  (left, middle) the performance degrades with vocabulary size, with worst scaling for Zipf-distributed data ( $\alpha = 1$ ). When the frequencies have lighter tails ( $\alpha = 2$ , right) GD works well for all vocabulary sizes. Our objective is to derive scaling laws explaining this behavior.

Our approach is inspired by the line of work on theoretical scaling laws, or asymptotic convergence as the dimensionality grows (e.g., Caponnetto and Vito, 2007; Advani et al., 2020; Berthier et al., 2020; Bahri et al., 2021; Cui et al., 2021; Maloney et al., 2022; Paquette et al., 2024). Instead of analyzing the generalization error of online gradient descent as the dimension of the model and sample size grow, we study the convergence rate of GD as the dimension and the number of iterations grow. Spectral assumptions on the eigenvalues of the Hessian following a power-law are common in the literature, as they correspond to assumptions on the covariance of the features. But these works focus on power-laws that are not “too” heavy-tailed,  $1/k^\alpha$  with  $\alpha > 1$ , which lead to sublinear convergence rates independent of dimension. In contrast, we focus on the case  $\alpha \leq 1$  where it becomes impossible to make progress with a fixed number of steps as the dimensionality grows. We show that it is possible to make progress by finding the right scaling of the number of iterations with the dimension.

## 1.1 Contributions

1. We propose a simplified model of the data frequencies that allows for tractable closed-form dynamics on the linear bigram problem for both GD and SD. We show experimentally that the scaling under that model matches empirical performance (Fig. 2).
2. We derive scaling laws for GD and SD under this simplified model as a function of  $\alpha > 0$ . These results cover the challenging case of power-laws decreasing as slow or slower than Zipf’s law ( $\alpha \leq 1$ ) that is often ignored in asymptotic analyses. This setting leads to a qualitatively different result, requiring the number of iterations to grow with  $d$ .
3. We show that sign descent with a well-selected step-size scales better with dimension than GD for Zipf-distributed data. This result confirms the benefits of SD and preconditioning-like interventions to mitigate the poor performance of GD. However, this result is specific to the regime  $\alpha \leq 1$ , as sign descent exhibits worse scaling otherwise, showing that which algorithm performs better depends on properties of the data.

## 1.2 Overview of the results

Given matrices  $\mathbf{X}$  and  $\mathbf{Y} \in \{0, 1\}^{n \times d}$  containing the one-hot encodings of  $n$  pairs of tokens from a vocabulary of  $d$  possible words, we fit a linear bigram model by minimizing the loss

$$\mathcal{L}_d(\mathbf{W}) = \frac{1}{2n} \|\mathbf{X}\mathbf{W} - \mathbf{Y}\|_F^2, \quad \text{where} \quad \mathbf{W} \in \mathbb{R}^{d \times d}, \quad \|\mathbf{X}\|_F^2 = \text{Tr}(\mathbf{X}^\top \mathbf{X}).$$

We assume that the distribution of the tokens and the conditional distribution of the next tokens follow a power law  $1/k^\alpha$  with exponent  $\alpha$ , formalized later in Assumption 2.3. Our main result is as follows.

**Theorem 1.1** (Informal). *Consider the linear bigram model when the dimensionality  $d$  is large. The number of iterations  $t$  required to reach  $\varepsilon$  relative accuracy with gradient descent scales as follows.*

$$\text{If } \alpha < 1, \quad t \approx d^\alpha \log(1/\varepsilon), \quad \text{if } \alpha = 1, \quad t \approx d^{1-\varepsilon}, \quad \text{and if } \alpha > 1, \quad t \approx (1/\varepsilon)^{\frac{\alpha}{\alpha-1}}.$$

For sign descent, there is a constant step-size  $\eta$  depending on  $d$  and  $t$  such that, after  $t$  steps,

$$\text{if } \alpha < 1/2, \quad t \approx (1/\varepsilon)^{\frac{1}{2(1-2\alpha)}}, \quad \text{if } \alpha = 1/2, \quad t \approx d^{\frac{1-\varepsilon}{2}}, \quad \text{and if } \alpha > 1/2, \quad t \approx d/\varepsilon^{1/2}.$$

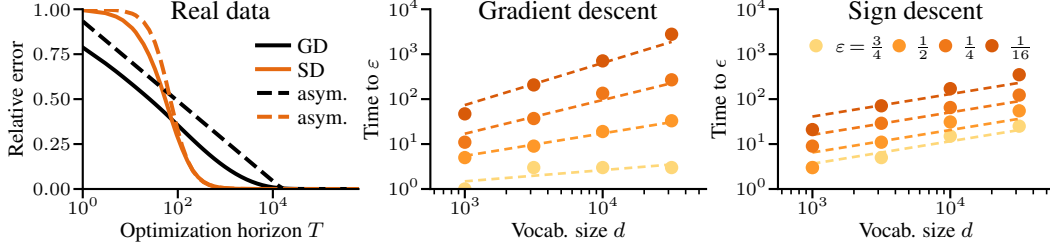

Figure 2: **Our scaling predicts the behavior of gradient descent and sign descent on real data.** Left: the convergence of gradient descent (GD) and sign descent (SD) is close to our asymptotic prediction (— —, — —) on a bigram model with 32k tokens on OpenWebText, although not exactly due to the finite dimension and our simplified model of the frequencies in [Assumption 2.3](#). Middle/Right: as  $d$  grows, the number of iterations required to reach  $\epsilon$  relative error matches our predictions, showing that SD scales better with dimension for small  $\epsilon$ . We show results on real data (dots) against the scaling of  $cd^{1-\epsilon}$  for GD and  $cd^{1/2}$  for SD (dashes) where  $c$  is fit to the data.

By relative accuracy, we mean that  $\mathcal{L}_d(t) - \mathcal{L}_d^* = \epsilon(\mathcal{L}_d(0) - \mathcal{L}_d^*)$ , where  $\mathcal{L}_d(t)$  is the loss after  $t$  steps and  $\mathcal{L}_d^*$  is the minimum loss. By  $t \approx f(d, \epsilon)$ , we mean that there exists a constant  $c \in [a, b]$  where  $a, b$  are constants depending on  $\alpha$  but not on  $d$  or  $\epsilon$  such that if  $t(d, \alpha) = cf(d, \alpha) + O(\log \log(1/\epsilon))$ ,

$$\lim_{d \rightarrow \infty} \frac{\mathcal{L}_d(t(d, \alpha)) - \mathcal{L}_d^*}{\mathcal{L}_d(0) - \mathcal{L}_d^*} = \epsilon.$$

While we do recover the traditional scaling of  $(1/\epsilon)^{-p}$  for some  $p$  for gradient descent in the case  $\alpha > 1$ , our scaling laws do not all follow this functional form. For  $\alpha \leq 1$ , our model recover a linear rate scaling with  $d^\alpha$ . But for Zipf-distributed data ( $\alpha = 1$ ), the number of iterations required to reach  $\epsilon$  relative error scales with  $d^{1-\epsilon}$ . If only a rough solution is required ( $\epsilon$  close to 1) GD scales mildly with dimension, but obtaining a good model ( $\epsilon$  close to 0) scales almost linearly with dimension. SD instead scales as  $d^{1/2}$ , which is a significant improvement in large dimension, giving a 100-times speedup for vocabulary sizes commonly used in practice. We confirm these predictions experimentally for finite dimensional models using real data on OpenWebText, shown in [Fig. 2](#).

### 1.3 Related work

**Convergence of Adam and sign descent.** Sign descent is a common proxy for Adam as it captures the main property, that the updates are uniform across coordinates (Bernstein et al., 2018; Balles et al., 2020; Chen et al., 2023). This “scale-freeness” has been shown to reduce the dependence on the condition number of the problem (Zhuang et al., 2022). However, this result does not imply SD outperforms GD, as known results for sign-like methods depend on the dimension  $d$  instead of the condition number (e.g., Safaryan and Richtárik, 2021; Das et al., 2024; Liu et al., 2025). In the bigram problem with Zipf-distributed data, the dimension grows faster than the condition number, leading to worse guarantees for sign descent. Instead of worst-case bounds, we rely on more fine-grained assumptions on the data and asymptotic equivalence to obtain the results of [Theorem 1.1](#). We compare our results to existing rates in [Appendix B](#).

**SDE approximations of sign methods.** Scaling laws have been derived for online sign-like algorithms through stochastic differential equations (Ma et al., 2021; Malladi et al., 2022; Xiao et al., 2024; Compagnoni et al., 2025). The focus of these works is on the scaling of the step-size with batch size and the asymptotic stationary distribution of the algorithm which controls the generalization error. As noise is not necessary to reproduce the performance gap between GD and Adam (Kunstner et al., 2023), we instead focus on the impact of heavy-tailed data on the deterministic dynamics.

**Scaling laws and asymptotic results.** Empirical scaling laws have been developed to extrapolate the performance of deep networks at scale and how to balance compute across model and data sizes (Rosenfeld et al., 2020; Kaplan et al., 2020; Hoffmann et al., 2022). Many works have contributed to the theoretical understanding of this scaling behavior through high dimensional analyses and random matrix theory (Advani et al., 2020; Bahri et al., 2021; Maloney et al., 2022; Bordonon et al., 2024a; Lin et al., 2024; Paquette et al., 2024), or using classical source/capacity conditions from learning theory (Caponnetto and Vito, 2007; Berthier et al., 2020; Cui et al., 2021), see Velikanov

and Yarotsky (2024) for the use of source/capacity conditions in the context of optimization. These works assume the eigenvalues decay as a power law with exponent  $\alpha > 1$ . The resulting scalings are consistent with the observation that training dynamics converge to a well-defined limit as width or depth increases (Yang et al., 2021; Bordelon et al., 2024b; Noci et al., 2024), but does not describe the regime  $\alpha \leq 1$ , which includes Zipf’s law. This regime might be more relevant when considering scaling the vocabulary size, as in the work of Gowda and May (2020) and Tao et al. (2024). While they hypothesize that larger vocabularies might lead to worse performance due to overfitting, as larger vocabularies implies fewer examples per word, we show that larger vocabulary size introduces difficulties in getting the *training error* down. Closest to our work is perhaps the blog post of Bulatov (2023), who show that the loss under GD should approximately behave as  $-\log(t/d)$  on a problem matching our setting with  $\alpha = 1$ . Our work provides a formal justification for this scaling.

## 2 Problem setup

In this section, we present the problem setting, the modeling assumptions we introduce to make the problem tractable, and the approach we use to derive our results. We start from a convex quadratic in reduced form,  $f(\mathbf{x}) = \frac{1}{2}(\mathbf{x} - \mathbf{x}^*)^\top \mathbf{A}(\mathbf{x} - \mathbf{x}^*)$ , where the eigenvalues/vectors pairs of  $\mathbf{A}$  are  $(\lambda_i, \mathbf{v}_i) \in \mathbb{R} \times \mathbb{R}^d$  for  $i = 1, \dots, d$ . The loss can be expressed in terms of the distance to the solution along each eigenvector,  $\delta_i(\mathbf{x}) = \langle \mathbf{v}_i, \mathbf{x} - \mathbf{x}^* \rangle$ , as  $f(\mathbf{x}) = \frac{1}{2} \sum_{i=1}^d \lambda_i \delta_i(\mathbf{x})^2$ . The dynamics of GD with step-size  $\eta$ ,  $\mathbf{x}_{t+1} = \mathbf{x}_t - \eta \mathbf{A}(\mathbf{x}_t - \mathbf{x}^*)$ , are also available in closed-form,

$$f(\mathbf{x}_t) = \frac{1}{2}((1 - \eta \mathbf{A})^t(\mathbf{x}_0 - \mathbf{x}^*))^\top \mathbf{A}(1 - \eta \mathbf{A})^t(\mathbf{x}_0 - \mathbf{x}^*) = \frac{1}{2} \sum_{i=1}^d \lambda_i (1 - \eta \lambda_i)^{2t} \delta_i(\mathbf{x}_0)^2. \quad (1)$$

The specific quadratic problem we focus on is the linear bigram model with the square loss.

**Problem 2.1** (Linear bigram model with square loss). *Let  $\mathbf{x}_i, \mathbf{y}_i \in \{0, 1\}^d$  be  $n$  samples representing one-hot encodings from  $d$  classes (or tokens), with their concatenation  $\mathbf{X}, \mathbf{Y} \in \{0, 1\}^{n \times d}$ . We fit a linear model with weights  $\mathbf{W} \in \mathbb{R}^{d \times d}$  using the square loss,*

$$\mathcal{L}_d(\mathbf{W}) = \frac{1}{2n} \|\mathbf{X}\mathbf{W} - \mathbf{Y}\|_F^2.$$

We define  $\pi_k$  and  $\pi_{k|j}$  as the frequencies and conditional frequency statistics of the data,

$$\pi_k := \frac{1}{n} \sum_{i=1}^n \mathbb{1}_{x_i=k}, \quad \pi_{k|j} := \frac{\sum_{i=1}^n \mathbb{1}_{y_i=k} \mathbb{1}_{x_i=j}}{\sum_{i=1}^n \mathbb{1}_{x_i=j}}, \quad (\text{with the convention } 0/0 = 0) \quad \forall j, k \in [d].$$

The eigenvalues and distances to the solution are directly related to the frequency statistics.

**Proposition 2.2.** *The eigenvalues and distances to the solution of Problem 2.1 initialized at  $\mathbf{W} = 0$  are*

$$\lambda_{ij} = \pi_i \quad \text{and} \quad \delta_{ij}(0) = \pi_{j|i} \quad \text{for } i, j \in [d].$$

*Proof.* The optimization problem separates into  $d$  independent  $d$ -dimensional subproblems,

$$\mathcal{L}_d(\mathbf{W}) = \frac{1}{2n} \|\mathbf{X}\mathbf{W} - \mathbf{Y}\|_F^2 = \sum_{j=1}^d \frac{1}{2n} \|\mathbf{X}\mathbf{w}^j - \mathbf{y}^j\|_2^2,$$

where  $\mathbf{w}^j, \mathbf{y}^j \in \mathbb{R}^d$  are the  $j$ th columns of  $\mathbf{W}, \mathbf{Y}$ . Each subproblem has the same Hessian given by  $\mathbf{X}^\top \mathbf{X}/n = \text{Diag}([\pi_1, \dots, \pi_d])$ , so the eigenvalues are the frequencies, each with multiplicity  $d$ . From  $\mathbf{w}^j = 0$ , the distance to the solution is the magnitude of the solution  $\mathbf{s}^j$  of the normal equations,

$$\mathbf{s}^j = (\mathbf{X}^\top \mathbf{X})^{-1} \mathbf{X}^\top \mathbf{y}^j = [\pi_{1|j}, \dots, \pi_{d|j}]^\top,$$

as  $\mathbf{X}$  and  $\mathbf{y}^j$  are one-hot,  $(\mathbf{X}^\top \mathbf{y}^j)_k = \sum_{i=1}^n \mathbb{1}_{x_i=k} \mathbb{1}_{y_i=j}$  and  $(\mathbf{X}^\top \mathbf{X})_{kk} = \sum_{i=1}^n \mathbb{1}_{x_i=k}$ .  $\square$

### 2.1 Modeling assumptions

Getting an interpretable form of the convergence of Eq. (1) requires assumptions on the values of  $\lambda_i$  and  $\delta_i$ . Assuming  $\mu \leq \lambda_i \leq L$  leads to the typical rates in smooth (strongly-)convex optimization,

$$\mathcal{L}(\mathbf{w}_t) - \mathcal{L}^* \leq \frac{L \sum_{i=1}^d \delta_i(\mathbf{w}_0)^2}{t}, \quad \mathcal{L}(\mathbf{w}_t) - \mathcal{L}^* \leq \left(1 - \frac{\mu}{L}\right)^t (\mathcal{L}(\mathbf{w}_0) - \mathcal{L}^*),$$

where  $\mathcal{L}^*$  is the minimum loss (see, e.g., Nesterov, 2018). While valid, these worst-case bounds are too coarse to capture the richness of the behavior of GD and become vacuous in high-dimensions. We

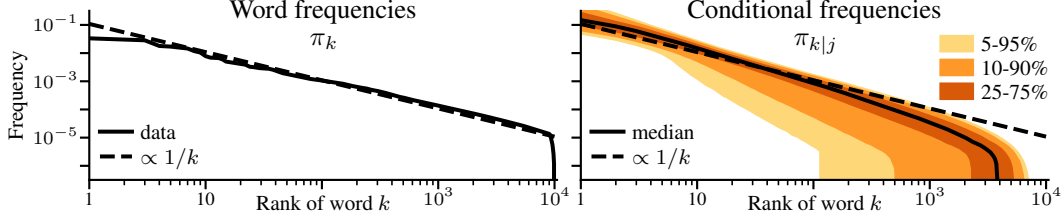

Figure 3: **Token frequencies and conditional frequencies approximately follow Zipf’s law.** The approximation of [Assumption 2.3](#) (— —) provides a reasonable approximation of the frequencies (left) and conditional frequencies (right) on text data, computed on OpenWebText for a vocabulary of  $10^4$  words. For a word  $k$ , the right plot shows the median and quantiles of the distribution  $\pi_k|_j$  for  $j \in [d]$ .

140 compare our results to classical rates in [Appendix B](#). To obtain more fine-grained results, we assume  
 141 that the distributions of the frequencies  $\pi_k$  and conditional frequencies  $\pi_k|_j$  follow power laws.

142 **Assumption 2.3** (Heavy-tailed data). *We assume that the frequencies and conditional frequencies*  
 143 *follow a frequency-rank power law with exponent  $\alpha > 0$ . That is, assuming the frequencies are*  
 144 *sorted ( $\pi_k \geq \pi_{k+1}$ ) and defining the sorting permutations  $\rho_j$  such that  $\pi_{\rho_j(k+1)}|_j \geq \pi_{\rho_j(k)}|_j$ ,*

$$\pi_k \propto \frac{1}{k^\alpha} \quad \text{and} \quad \pi_{\rho_j(k)}|_j \propto \frac{1}{k^\alpha}, \quad \text{for all } j, k,$$

145 where by  $\pi_k \propto 1/k^\alpha$  we mean the the distribution is normalized,  $\pi_k = 1/z k^\alpha$  where  $z = \sum_{k=1}^d 1/k^\alpha$ .

146 This assumption may appear strong, as it would be satisfied for example if the words were sampled i.i.d.  
 147 with frequencies  $\pi_1, \dots, \pi_d$  as  $\pi_k|_j = \pi_k$ . But it does not require that all conditional distributions  
 148 be the same, and the most likely next-token after word  $j$  can depend on  $j$ . This assumption merely  
 149 asks that, once sorted, the next-word frequencies also follow a power law with the same exponent.  
 150 Some distributions might deviate from this trend if a token can only logically be followed by specific  
 151 tokens, or if the word being conditioned on is rare and our dataset is relatively small.<sup>1</sup> While we do  
 152 not expect the assumption to be exactly satisfied in practice, it appears to be a reasonable high-level  
 153 approximation of real-world data, as shown in [Fig. 3](#) in comparison to the empirical distributions on  
 154 OpenWebText, and leads to accurate predictions as shown in [Fig. 2](#). This form of spectral assumption  
 155 is similar to the source/capacity conditions (Caponnetto and Vito, 2007), see Velikanov and Yarotsky  
 156 (2024) for an account in optimization. We compare [Assumption 2.3](#) to related settings in [Appendix B](#).

## 157 2.2 Strategy for the analysis

158 Our goal is to derive scaling laws for the loss of [Problem 2.1](#) in  $d$  dimensions after  $t$  steps,  $\mathcal{L}_d(t)$ ,  
 159 as  $d \rightarrow \infty$ . Such scaling laws can be interpreted as approximating the convergence rate for large  $d$ , or  
 160 serve as a guide on how to scale the hyperparameters of the optimizer as we increase the vocabulary  
 161 size. Formally, we compute the asymptotic limit of the rate  $r(t)$  at which the relative loss decreases,

$$\mathcal{L}_d(t) - \mathcal{L}_d^* \stackrel{d}{\sim} r(t)(\mathcal{L}_d(0) - \mathcal{L}_d^*), \quad \text{where } \stackrel{d}{\sim} \text{ is notation for } \lim_{d \rightarrow \infty} \frac{\mathcal{L}_d(t) - \mathcal{L}_d^*}{\mathcal{L}_d(0) - \mathcal{L}_d^*} = r(t),$$

162 Works on scaling laws typically model the absolute value of the loss. This approach degenerates when  
 163 the loss at initialization vanishes or diverges as  $d \rightarrow \infty$  which happens when  $\alpha \leq 1$ . Considering the  
 164 relative decrease circumvents the issue, as also noted by Bulatov (2023) and Tao et al. (2024).

165 Another potential degeneracy is the scaling of time. If the problem becomes more difficult as  $d$  grows,  
 166 it might be impossible to make progress in finite time. To take a concrete example, suppose that  $\mathcal{L}_d^* = 0$   
 167 and  $\mathcal{L}_d(t) = r_d(t)\mathcal{L}_d(0)$  with  $r_d(t) = (1 - 1/d)^t$ . If we take the limit as  $d \rightarrow \infty$  for a fixed  $t$ , we  
 168 obtain  $\lim_{d \rightarrow \infty} (1 - 1/d)^t = 1$ . The rate no longer depends on  $t$ , and we cannot make progress unless  $t$   
 169 grows with  $d$ . If we instead introduce a rescaled time variable  $\tau$  and scale  $t_d(\tau) = \tau d$ , we recover a  
 170 linear rate in the rescaled time  $\tau$  as  $(1 - 1/d)^{\tau d} \stackrel{d}{\sim} e^{-\tau}$ . This is the same issue encountered in random  
 171 matrix theory, where the dimensions of the matrix are taken to grow jointly with a fixed ratio to avoid  
 172 degenerate solutions (Potters and Bouchaud, 2020). It can be verified that  $t_d(\tau) = \tau d$  is the “right”

<sup>1</sup>Even with i.i.d. data from a power law  $\pi_k \propto 1/k$ , accurately estimating the frequency of rare next-tokens takes a large number of samples. With a vocabulary size of  $d = 3 \cdot 10^4$ , common for large language models, we expect to see only one example of the pair  $(x = d, y = d)$  every  $10^9$  tokens.

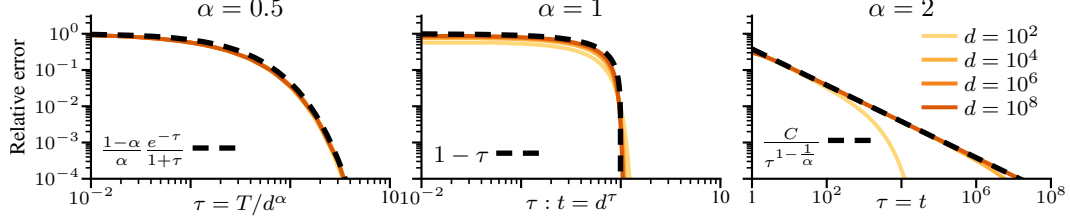

Figure 4: **Scaling of gradient descent on power-law data with exponent  $\alpha$  (Theorem 3.1).** The dynamics of gradient descent on the linear bigram model with data satisfying Assumption 2.3 converge to our scaling law (—, Theorem 3.1) as  $d$  grows. Achieving a relative error  $\varepsilon$  requires scaling the iteration budget  $T$  with  $d^\alpha$  for  $\alpha < 1$ ,  $T$  with  $d^{1-\varepsilon}$  for  $\alpha = 1$ , and no scaling for  $\alpha > 1$ .

scaling, as the limit  $r_d(t_d(\tau))$  degenerates otherwise. Using  $f(x) \ll g(x)$  for  $\lim_{x \rightarrow \infty} f(x)/g(x) = 0$ , we have  $r_d(t_d(\tau)) \stackrel{d}{\sim} 1$  if  $t_d(\tau) \ll d$  and  $r_d(t_d(\tau)) \stackrel{d}{\sim} 0$  if  $t_d(\tau) \gg d$ ; we either make no progress or solve the problem instantly. Our results are derived by taking the finite dimensional rate  $r_d(t)$  with a scaling  $t_d$  such that the asymptotic rate  $r(\tau)$  is well defined in terms of the rescaled time  $\tau$ ,

$$r(\tau) := \lim_{d \rightarrow \infty} r_d(t_d(\tau)) = \lim_{d \rightarrow \infty} \frac{\mathcal{L}_d(t_d(\tau)) - \mathcal{L}_d^*}{\mathcal{L}_d(0) - \mathcal{L}_d^*}. \quad (2)$$

### 3 Scaling laws for gradient descent

We are now ready to move on to the main results for the scaling laws of gradient descent.

**Theorem 3.1** (Scaling for gradient descent). *On the bigram problem (Prob. 2.1) with distributions following a power law with exponent  $\alpha > 0$  (Assumption 2.3), gradient descent with a step-size  $1/\pi_1$ , with time scaling  $t_d(\tau)$  has the following asymptotic convergence rate (Eq. (2)).*

$$\begin{aligned} \text{If } \alpha < 1, \quad t_d(\tau) &= \frac{1}{2} \tau d^\alpha, & r(\tau) &= \frac{1-\alpha}{\alpha} E_{\frac{1}{\alpha}}(\tau) \sim \frac{1-\alpha}{\alpha} \frac{e^{-\tau}}{\tau+1}, \\ \text{if } \alpha = 1, \quad t_d(\tau) &= \frac{1}{2} d^\tau, & r(\tau) &= 1 - \tau \quad \text{where } \tau \in [0, 1], \\ \text{if } \alpha > 1, \quad t_d(\tau) &= \tau, & r(\tau) &= \frac{B(1 - \frac{1}{\alpha}, 1 + 2t)}{\alpha \zeta(\alpha)} \sim C \frac{1}{\tau^{1-\frac{1}{\alpha}}} \mathcal{L}_d(0), \end{aligned}$$

where  $\Gamma$  is the Gamma function,  $E_p$  is the generalized exponential integral,  $B$  is the Beta function, and  $\zeta$  is the zeta function (DLMF, §5.2, §5.12 §8.19 §25.2), and  $C = \Gamma(1 - \frac{1}{\alpha})/\alpha \zeta(\alpha)$ .

*Proof.* We sketch the proof for  $\alpha = 1$  and leave the remaining cases to Appendix C. Under Eq. (1) and Assumption 2.3 the dynamics of the normalized loss  $r_d(t) = \mathcal{L}_d(t) - \mathcal{L}_d^* / \mathcal{L}_d(0) - \mathcal{L}_d^*$  reduce to

$$\mathcal{L}_d(t) = \left( \frac{1}{\sum_{k=1}^d k^{-\alpha}} \sum_{k=1}^d k^{-\alpha} (1 - k^{-\alpha})^t \right) \mathcal{L}_d(0), \quad \text{so} \quad r_d(t) = \frac{1}{H_{d,\alpha}} \sum_{k=1}^d k^{-\alpha} (1 - k^{-\alpha})^t,$$

where  $H_{d,\alpha} = \sum_{k=1}^d k^{-\alpha}$ . To simplify the analysis, we use the integral form of the sum as we can use Laplace's method to estimate its behavior for large  $d$ , see Appendix C for a formal justification;

$$\text{For } \alpha = 1, \quad r_d(t) \approx I_d(t) = \frac{1}{H_{d,1}} \int_1^d k^{-1} (1 - k^{-1})^t dk = \frac{1}{H_{d,1}} \log(d) \int_0^1 (1 - d^{-z})^t dz,$$

after the change of variable  $k = d^z$  or  $z = \log(k)/\log(d)$ . As the normalizer  $H_{d,1} \stackrel{d}{\sim} \log(d)$ , we only need to consider the limit of the integral. Taking  $d \rightarrow \infty$  with  $t$  fixed, the integral converges to 1 and we make no progress, regardless of  $t$ . To make progress,  $t$  needs to scale as  $t = d^\tau$  for  $\tau \in [0, 1]$ ,

$$I_d(d^\tau) = \frac{\log(d)}{H_{d,\alpha}} \int_0^1 \left( 1 - \frac{d^{\tau-z}}{d^\tau} \right)^{d^\tau} dz.$$

For a fixed  $\tau$  and as  $d \rightarrow \infty$ , the integrand converges to 0 if  $z < \tau$  and 1 if  $z > \tau$ . As it is bounded by a constant, we can exchange limits and integrals by the dominated convergence theorem, obtain

$$\lim_{d \rightarrow \infty} \int_0^1 \left( 1 - \frac{d^{\tau-z}}{d^\tau} \right)^{d^\tau} dz = \int_0^\tau 0 dz + \int_\tau^1 1 dz = 1 - \tau. \quad \square$$



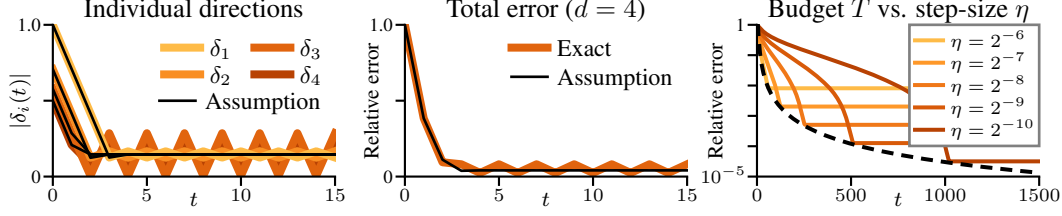

Figure 5: **Illustration of our modeling assumption for sign descent (Assumption 4.1).** Left: instead of modeling the oscillations of sign descent, we treat the oscillatory phase as constant. Middle: The effect on the total error. Right: Because SD eventually oscillates, the step-size needs to depend on the iteration budget  $T$  to achieve best performance after  $T$  steps (the envelope  $- -$ ).

The results highlight the need for a different scaling as a function of  $\alpha$ . The number of iterations needs to scale with dimension if the data decays as slow as Zipf’s law or slower ( $\alpha \leq 1$ ) whereas it is not necessary for lighter-tailed data ( $\alpha > 1$ ). We show in Fig. 4 that the optimization dynamics in finite dimension on data satisfying Assumption 2.3 converge to the asymptotic rates of Theorem 3.1 and are accurate even for common vocabulary sizes.

## 4 Scaling laws for sign descent

We now move to the case of SD. Before going into the results, we need to address two issues. First, the sign descent update is not linear. We thus need to establish an alternative to the closed form solution of GD in Eq. (1), but for SD. Second, SD does not converge with a fixed step-size. We thus need to scale step-size as a function of the iteration budget and dimension.

### 4.1 Sign descent dynamics

If run with a constant step-size, the update of sign descent with a step-size of  $\eta$  is

$$\mathbf{W}_{t+1} = \mathbf{W}_t - \eta \text{sign}(\nabla \mathcal{L}(\mathbf{W}_t)).$$

As the Hessian of Problem 2.1 is diagonal, the update applies independently to each eigenvector. Letting  $\delta_{ij}(t)$  be the distance along the  $(i, j)$ th eigenvector at step  $t$ ,

$$\delta_{ij}(t+1) = \delta_{ij}(t) - \eta \text{sign}(\delta_{ij}(t)).$$

The difficulty in the analysis comes from the fact that  $|\delta_{ij}(t)|$  does not converge to 0. Instead,  $|\delta_{ij}(t)|$  will oscillate between some  $c \in (0, \eta)$  and  $c - \eta$ , unless  $t = |\delta_{ij}(t)|/\eta$  is an integer. To simplify the analysis, we make the following assumption, essentially “averaging” the oscillations to  $\eta/2$ .

**Assumption 4.1.** We assume that sign descent with step-size  $\eta$  follows the dynamics

$$|\delta_{ij}(t)| := \begin{cases} |\delta_{ij}(0)| - t\eta & \text{if } |\delta_{ij}(t-1)| - \eta \geq 0, \\ \eta/2 & \text{otherwise.} \end{cases}$$

Under this assumption, the distances decrease while  $t < |\delta_{ij}(0)|/\eta$  then go to  $\eta/2$  to model the oscillatory regime,<sup>2</sup> as illustrated in Fig. 5. Using this assumption, we have the following dynamics.

**Proposition 4.2.** If the conditional distribution follows a power law with exponent  $\alpha$  as in Assumption 2.3, the dynamics of sign descent with step-size  $\eta$  in Assumption 4.1 lead to the loss

$$\mathcal{L}_d(t, \eta) := \sum_{i=1}^d \sum_{j=1}^d \lambda_{ij} \delta_{ij}(t)^2 = \sum_{k=1}^{k_*} (\delta_k(0) - t\eta)^2 + \sum_{k=k_*+1}^d \left(\frac{\eta}{2}\right)^2 \quad \text{where} \quad \delta_k(0) = \pi_k,$$

and  $k_*$  is the number of directions in the decreasing regime.

<sup>2</sup>We could instead model the switch between the decreasing and oscillatory phase as  $\max(|\delta_{ij}(0)| - t\eta, \eta/2)$ . But under this model the transition occurs at  $|\delta_{ij}(0)| = \eta(t + 1/2)$  instead of  $|\delta_{ij}(0)| = \eta t$ . We chose the formulation in Assumption 4.1 to not carry this  $1/2$  term as the difference is small for large  $t$ . Neither form captures the fact that a direction might reach exactly 0, after which the oscillatory phase would then not happen, but only a small number of directions can reach 0 if  $|\delta_{ij}(0)| \propto 1/j^\alpha$ , and their impact vanishes as  $d$  grows.

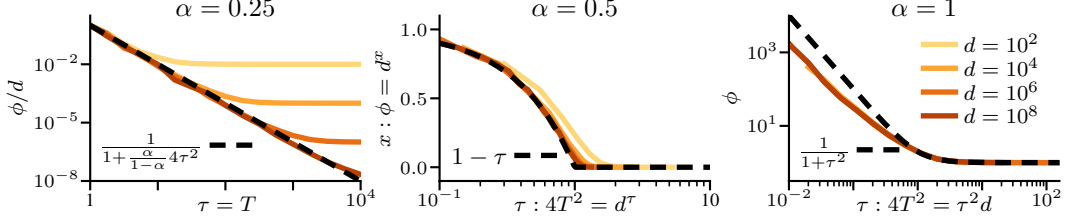

Figure 6: **Convergence of the best step-size for sign descent to the scaling in Definition 4.4.** The optimal step-size for  $T$  steps of sign descent converge to our scaling (—) given in Definition 4.4 (for  $\tau > 1$  in the case of  $\alpha = 1$ ). Computed by grid search on the linear bigram model with data satisfy Assumption 2.3.

216 *Proof.* By Proposition 2.2,  $\lambda_{ij} = \pi_i$  does not depend on  $j$ . By Assumption 2.3, there is a per-  
 217 mutation  $\rho_i$  such that  $\delta_{i\rho_i(j)}(0) = \pi_j$ . As a result, the dynamics of  $\delta_{i\rho_i(j)}(t)$  do not depend on  $i$ .  
 218 Writing  $\delta_j(t) = \delta_{i\rho_i(j)}(t)$  for any  $i$  and using that  $\sum_{i=1}^d \pi_i = 1$ ,

$$\sum_{i=1}^d \sum_{j=1}^d \lambda_{ij} \delta_{ij}(t)^2 = \sum_{i=1}^d \pi_i \sum_{j=1}^d \delta_{ij}(t)^2 = \sum_{i=1}^d \pi_i \sum_{j=1}^d \delta_j(t)^2 = \sum_{j=1}^d \delta_j(t)^2.$$

219 We then split the sum depending on whether  $|\delta_k(t)|$  is decreasing or oscillating.  $\square$

## 220 4.2 Scaling of the step-size

221 As SD with a fixed step-size eventually enters an oscillatory regime, the loss we converge to as  $t$   
 222 grows depends on  $\eta$ . To describe the performance achievable after tuning  $\eta$  for a given budget  $T$ ,  
 223 we need to estimate how  $\eta$  scales with  $T$  and  $d$ . This effect is illustrated in Fig. 5 (right). We use  
 224 capital  $T$  to emphasize that we are modeling the loss at the end of a training run of  $T$  steps with a  
 225 fixed step-size which depends on  $T$ . Getting the exact form of  $\eta_* = \min_{\eta} \mathcal{L}_d(T, \eta)$  is out of reach,  
 226 but we establish bounds on the optimal step-size.

227 **Proposition 4.3.** *The step-size  $\eta_*$  that  $\mathcal{L}_d(T, \eta)$  in Proposition 4.2 given  $T$  and  $d$ , satisfies*

$$\frac{\delta_d(0)}{T} \leq \eta_* \leq \frac{\delta_1(0)}{T}.$$

228 *Proof.* If  $\eta \leq \delta_d(0)/T$ , all directions are still in the decreasing regime of Assumption 4.1 at time  $T$ .  
 229 As long as  $T\eta < \delta_d(0)$ , increasing the step-size leads to more progress. Similarly, if  $T\eta \geq \delta_1(0)$ , all  
 230 directions are in the oscillatory regime, and reducing the step-size reduces the oscillations.  $\square$

231 As our initial distances follow a power law,  $\delta_k(0) = \pi_k = \frac{1}{z k^\alpha}$  where  $z = \sum_{k=1}^d k^{-\alpha}$ , Proposition 4.3  
 232 suggests an alternative parameterization of the step-size as

$$\eta(\phi) = \frac{1}{z T \phi^\alpha} \quad \text{with} \quad 1 \leq \phi \leq d,$$

233 where  $\phi$  controls how many directions are still decreasing. We now define the following scaling of  $\phi$ .

234 **Definition 4.4.** *We define the following scalings as a function of the dimension  $d$  and rescaled time  $\tau$*

$$\begin{aligned} \text{if } \alpha < 1/2, \quad T_d(\tau) &= \tau, \quad \phi_d(\tau) = \begin{cases} d & \text{if } \tau^2 \leq 1 - c_1/4c_2, \\ d(c_1 + 4c_2\tau^2)^{-1} & \text{otherwise,} \end{cases} \\ \text{if } \alpha = 1/2, \quad T_d(\tau) &= \frac{1}{2}d^{\frac{1}{2}\tau}, \quad \phi_d(\tau) = d^{1-\tau}, \quad \text{where } \tau \in [0, 1], \\ \text{if } \alpha > 1/2, \quad T_d(\tau) &= \frac{1}{2}\tau\sqrt{d}, \quad \phi_d(\tau) = \begin{cases} 1 + 1/\tau^2 & \text{if } \tau^2 < (2^\alpha - 1)^{-1} \text{ and } \alpha < 1, \\ (1 + 1/\tau^2)^{1/\alpha} & \text{otherwise,} \end{cases} \end{aligned}$$

235 where  $c_1 = 1 - \frac{1}{2\alpha}$ ,  $c_2 = \frac{\alpha}{\alpha-1}$ .

236 While those scalings need not be optimal, they match the empirical behavior of the best step-  
 237 size computed by grid-search, as shown in Fig. 6. For  $\alpha > 1/2$ , the step-size is only accurate  
 238 for  $\tau^2 \geq 1/(2^\alpha - 1)$  or  $\tau \geq 1$  for  $\alpha = 1$ . We justify those estimates in Appendix D.



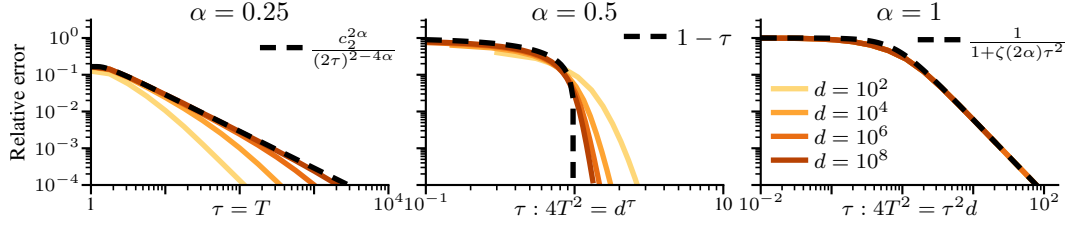

Figure 7: **Scaling of sign descent on power-law data with exponent  $\alpha$  (Theorem 4.5).** The dynamics of sign descent on the linear bigram model with data satisfying Assumption 2.3 converge to our scaling law (—) as  $d$  grows, as described in Theorem 4.5. Achieving a relative error  $\varepsilon$  requires no scaling for  $\alpha < 1/2$ , scaling  $t$  with  $d^{(1-\varepsilon)/2}$  for  $\alpha = 1/2$ , and  $t$  with  $d^{1/2}$  for  $\alpha > 1/2$ .

### 4.3 Asymptotic behavior

Using the scalings for  $T$  and  $\phi$  in Definition 4.4, we define the asymptotic rate of sign descent as

$$r(\tau) = \lim_{d \rightarrow \infty} \frac{\mathcal{L}_d(T_d(\tau), \phi_d(\tau)) - \mathcal{L}_d^*}{\mathcal{L}_d(0) - \mathcal{L}_d^*}. \quad (3)$$

**Theorem 4.5** (Scaling for sign descent). *Given scalings for  $T$  and  $\phi$  in Definition 4.4, the asymptotic convergence rate of sign descent (Eq. (3)) is, with  $c_1 = 1 - \frac{1}{2\alpha}$ ,  $c_2 = \frac{\alpha}{\alpha-1}$ ,*

$$\begin{aligned} \text{if } \alpha < 1/2, \quad T_d(\tau) &= \tau, & r(\tau) &= \begin{cases} 2\alpha c_2 & \text{if } \tau^2 \leq \frac{1-c_1}{4c_2} \\ \frac{(c_1+c_2 4\tau^2)^{2\alpha}}{4\tau^2} & \text{otherwise} \end{cases} \sim \frac{c_2^{2\alpha}}{(2\tau)^{2-4\alpha}}, \\ \text{if } \alpha = 1/2, \quad T_d(\tau) &= \frac{1}{2}d^{\frac{1}{2}\tau}, & r(\tau) &= 1 - \tau, \quad \text{where } \tau \in [0, 1], \\ \text{if } \alpha > 1/2, \quad T_d(\tau) &= \frac{1}{2}\tau\sqrt{d}, & r(\tau) &\sim \frac{1}{1 + \zeta(2\alpha)\tau^2}. \end{aligned}$$

We leave the proofs in Appendix D. The results also show different forms of scaling depending on  $\alpha$ , with a threshold at  $\alpha = 1/2$  instead of 1. However, the scaling in dimension is flipped compared to GD. SD needs  $t$  to scale with  $d$  when  $\alpha$  is large, which is the regime where GD can make progress with finite  $t$ . However, for the case of Zipf-distributed data ( $\alpha = 1$ ), SD only needs a scaling in  $d^{1/2}$  compared to the  $d^{1-\varepsilon}$  scaling of GD, showing that it achieves better performance for  $\varepsilon < 1/2$ . We show in Fig. 7 that the asymptotic rates of Theorem 3.1 are accurate even for finite  $d$ .

## 5 Conclusion

We have presented scaling laws for gradient descent (GD) and sign descent (SD) on the linear bigram model as a function of the power law exponent  $\alpha$  of the word frequencies. Rather than hide the dimension dependence in problem specific constants, we consider the scaling of running time and dimension as the problem grows in size to get precise estimates of the scaling. Our results highlight the benefit of SD and the need to address ill-conditioning to improve the performance of GD.

Our results show that the typical neural scaling law  $(1/\epsilon)^p$  for some  $p$  is specific to the regime  $\alpha > 1$ . This regime may accurately describe the dynamics as we increase width or depth and the training dynamics converge, but it might miss a large dimension dependence as we scale the vocabulary size. The scaling we obtain for  $\alpha < 1$  and  $\alpha = 1$  have a different functional form and highlight the dependency on dimension. For GD on Zipf-distributed data, the scaling of  $d^{1-\varepsilon}$  shows a non-trivial interplay between the desired error  $\varepsilon$  and the dimension. Our results suggests that longer training might be required when scaling the vocabulary size. Algorithms that target this dimension dependence, for example by estimating word frequencies (Li et al., 2022), would be an interesting next step.

Our approach however has limitations. We do not cover the online case, for which the analysis should be extendable using existings tools. The addition of momentum for sign descent would be more complex but particularly interesting to dampen oscillations. Handling more complex models such as bilinear models (Mikolov et al., 2013) or the cross-entropy loss would be interesting, but it is not obvious how to extend the analysis without a closed-form solution for the training dynamics. Finally, getting finite-dimensional results by tracking a correction term for finite  $d$  would be enlightening, as the convergence to the asymptotic regime can sometimes be slow, especially in the case  $\alpha = 1$ .

## References

- Madhu S. Advani, Andrew M. Saxe, and Haim Sompolsky (2020). “High-dimensional dynamics of generalization error in neural networks”. In: *Neural Networks* 132, pp. 428–446.
- Yasaman Bahri, Ethan Dyer, Jared Kaplan, Jaehoon Lee, and Utkarsh Sharma (2021). “Explaining Neural Scaling Laws”. arXiv/2102.06701.
- Lukas Balles, Fabian Pedregosa, and Nicolas Le Roux (2020). “The Geometry of Sign Gradient Descent”. arXiv/2002.08056.
- Jeremy Bernstein, Yu-Xiang Wang, Kamyar Azizzadenesheli, and Animashree Anandkumar (2018). “SIGNSGD: Compressed Optimisation for Non-Convex Problems”. In: *International Conference on Machine Learning (ICML)*.
- Raphaël Berthier, Francis R. Bach, and Pierre Gaillard (2020). “Tight Nonparametric Convergence Rates for Stochastic Gradient Descent under the Noiseless Linear Model”. In: *Neural Information Processing Systems (NeurIPS)*.
- Blake Bordelon, Alexander B. Atanasov, and Cengiz Pehlevan (2024a). “A Dynamical Model of Neural Scaling Laws”. In: *International Conference on Machine Learning (ICML)*.
- Blake Bordelon, Lorenzo Noci, Mufan Bill Li, Boris Hanin, and Cengiz Pehlevan (2024b). “Depthwise Hyperparameter Transfer in Residual Networks: Dynamics and Scaling Limit”. In: *International Conference on Learning Representations (ICLR)*.
- Stephen Boyd and Lieven Vandenbergh (2004). *Convex Optimization*. Cambridge University Press.
- Yaroslav Bulatov (2023). *Gradient descent under harmonic eigenvalue decay*. Blog post. <https://machine-learning-etc.ghost.io/gradient-descent-under-harmonic-eigenvalue-decay-average-case-analysis/>.
- Andrea Caponnetto and Ernesto De Vito (2007). “Optimal Rates for the Regularized Least-Squares Algorithm”. In: *Foundations of Computational Mathematics* 7.3, pp. 331–368.
- Xiangning Chen, Chen Liang, Da Huang, Esteban Real, Kaiyuan Wang, Hieu Pham, Xuanyi Dong, Thang Luong, Cho-Jui Hsieh, Yifeng Lu, and Quoc V. Le (2023). “Symbolic Discovery of Optimization Algorithms”. In: *Advances in Neural Information Processing Systems (NeurIPS)*.
- Enea Monzio Compagnoni, Tianlin Liu, Rustem Islamov, Frank Norbert Proske, Antonio Orvieto, and Aurelien Lucchi (2025). “Adaptive Methods through the Lens of SDEs: Theoretical Insights on the Role of Noise”. In: *International Conference on Learning Representations (ICML)*.
- Hugo Cui, Bruno Loureiro, Florent Krzakala, and Lenka Zdeborová (2021). “Generalization Error Rates in Kernel Regression: The Crossover from the Noiseless to Noisy Regime”. In: *Neural Information Processing Systems (NeurIPS)*.
- Rudrajit Das, Naman Agarwal, Sujay Sanghavi, and Inderjit S. Dhillon (2024). “Towards Quantifying the Preconditioning Effect of Adam”. arXiv/2402.07114.
- DLMF (2025). *NIST Digital Library of Mathematical Functions*. <https://dlmf.nist.gov/>, Release 1.2.4 of 2025-03-15. F. W. J. Olver, A. B. Olde Daalhuis, D. W. Lozier, B. I. Schneider, R. F. Boisvert, C. W. Clark, B. R. Miller, B. V. Saunders, H. S. Cohl, and M. A. McClain, eds.
- John C. Duchi, Elad Hazan, and Yoram Singer (2011). “Adaptive Subgradient Methods for Online Learning and Stochastic Optimization”. In: *Journal of Machine Learning Research (JMLR)* 12, pp. 2121–2159.
- Aaron Gokaslan, Vanya Cohen, Ellie Pavlick, and Stefanie Tellex (2019). *OpenWebText Corpus*. <http://Skylion007.github.io/OpenWebTextCorpus>.
- Thamme Gowda and Jonathan May (2020). “Finding the Optimal Vocabulary Size for Neural Machine Translation”. In: *Findings of the Association for Computational Linguistics (EMNLP)*.
- Jordan Hoffmann, Sebastian Borgeaud, Arthur Mensch, Elena Buchatskaya, Trevor Cai, Eliza Rutherford, Diego de Las Casas, Lisa Anne Hendricks, Johannes Welbl, Aidan Clark, Tom Hennigan, Eric Noland, Katherine Millican, George van den Driessche, Bogdan Damoc, Aurelia Guy, Simon Osindero, Karen Simonyan, Erich Elsen, Oriol Vinyals, Jack W. Rae, and Laurent Sifre (2022). “An

empirical analysis of compute-optimal large language model training (Training Compute-Optimal Large Language Models)". In: *Neural Information Processing Systems (NeurIPS)*.

Jared Kaplan, Sam McCandlish, Tom Henighan, Tom B. Brown, Benjamin Chess, Rewon Child, Scott Gray, Alec Radford, Jeffrey Wu, and Dario Amodei (2020). "Scaling Laws for Neural Language Models". Tech. report. arXiv/2001.08361.

Diederik P. Kingma and Jimmy Ba (2015). "Adam: A Method for Stochastic Optimization". In: *International Conference on Learning Representations (ICLR)*.

Taku Kudo and John Richardson (2018). "SentencePiece: A simple and language independent subword tokenizer and detokenizer for Neural Text Processing". In: *Empirical Methods in Natural Language Processing (EMNLP)*.

Frederik Kunstner, Jacques Chen, Jonathan Wilder Lavington, and Mark Schmidt (2023). "Noise is not the main factor behind the gap between SGD and Adam on transformers, but sign descent might be". In: *International Conference on Learning Representations (ICLR)*.

Frederik Kunstner, Alan Milligan, Robin Yadav, Mark Schmidt, and Alberto Bietti (2024). "Heavy-Tailed Class Imbalance and Why Adam Outperforms Gradient Descent on Language Models". In: *Advances in Neural Information Processing Systems (NeurIPS)*.

Yan Li, Dhruv Choudhary, Xiaohan Wei, Baichuan Yuan, Bhargav Bhushanam, Tuo Zhao, and Guanghui Lan (2022). "Frequency-aware SGD for Efficient Embedding Learning with Provable Benefits". In: *International Conference on Learning Representations (ICLR)*.

Licong Lin, Jingfeng Wu, Sham M. Kakade, Peter L. Bartlett, and Jason D. Lee (2024). "Scaling Laws in Linear Regression: Compute, Parameters, and Data". In: *Neural Information Processing Systems (NeurIPS)*.

Liyuan Liu, Xiaodong Liu, Jianfeng Gao, Weizhu Chen, and Jiawei Han (2020). "Understanding the Difficulty of Training Transformers". In: *Conference on Empirical Methods in Natural Language Processing (EMNLP)*.

Yuxing Liu, Rui Pan, and Tong Zhang (2025). "AdaGrad under Anisotropic Smoothness". In: *International Conference on Learning Representations (ICLR)*.

Chao Ma, Lei Wu, and Weinan E (2021). "A Qualitative Study of the Dynamic Behavior for Adaptive Gradient Algorithms". In: *Mathematical and Scientific Machine Learning (MSML)*.

Sadhika Malladi, Kaifeng Lyu, Abhishek Panigrahi, and Sanjeev Arora (2022). "On the SDEs and Scaling Rules for Adaptive Gradient Algorithms". In: *Neural Information Processing Systems (NeurIPS)*.

Alexander Maloney, Daniel A. Roberts, and James Sully (2022). "A Solvable Model of Neural Scaling Laws". arXiv/2210.16859.

Tomás Mikolov, Kai Chen, Greg Corrado, and Jeffrey Dean (2013). "Efficient Estimation of Word Representations in Vector Space". In: *International Conference on Learning Representations (ICLR)*.

Yurii E. Nesterov (2018). *Lectures on Convex Optimization*. Vol. 87. Springer.

Lorenzo Noci, Alexandru Meterez, Thomas Hofmann, and Antonio Orvieto (2024). "Super Consistency of Neural Network Landscapes and Learning Rate Transfer". In: *Neural Information Processing Systems (NeurIPS)*.

Elliot Paquette, Courtney Paquette, Lechao Xiao, and Jeffrey Pennington (2024). "4+3 Phases of Compute-Optimal Neural Scaling Laws". In: *Neural Information Processing Systems (NeurIPS)*.

Steven T. Piantadosi (2014). "Zipf's word frequency law in natural language: A critical review and future directions". In: *Psychonomic Bulletin & Review* 21, pp. 1112–1130.

Marc Potters and Jean-Philippe Bouchaud (2020). *A First Course in Random Matrix Theory: for Physicists, Engineers and Data Scientists*. Cambridge University Press.

Jonathan S. Rosenfeld, Amir Rosenfeld, Yonatan Belinkov, and Nir Shavit (2020). “A Constructive Prediction of the Generalization Error Across Scales”. In: *International Conference on Learning Representations (ICLR)*.

Mher Safaryan and Peter Richtárik (2021). “Stochastic Sign Descent Methods: New Algorithms and Better Theory”. In: *International Conference on Machine Learning (ICML)*.

Rico Sennrich, Barry Haddow, and Alexandra Birch (2016). “Neural Machine Translation of Rare Words with Subword Units”. In: *Annual Meeting of the Association for Computational Linguistics (ACL)*.

Chaofan Tao, Qian Liu, Longxu Dou, Niklas Muennighoff, Zhongwei Wan, Ping Luo, Min Lin, and Ngai Wong (2024). “Scaling Laws with Vocabulary: Larger Models Deserve Larger Vocabularies”. In: *Neural Information Processing Systems (NeurIPS)*.

Tijmen Tieleman and Geoffrey Hinton (2012). *RMSPROP: Divide the gradient by a running average of its recent magnitude*. Lecture notes [http://www.cs.toronto.edu/~tijmen/csc321/slides/lecture\\_slides\\_lec6.pdf](http://www.cs.toronto.edu/~tijmen/csc321/slides/lecture_slides_lec6.pdf).

Ashish Vaswani, Noam Shazeer, Niki Parmar, Jakob Uszkoreit, Llion Jones, Aidan N. Gomez, Lukasz Kaiser, and Illia Polosukhin (2017). “Attention is All you Need”. In: *Neural Information Processing Systems (NeurIPS)*.

Maksim Velikanov and Dmitry Yarotsky (2024). “Tight Convergence Rate Bounds for Optimization Under Power Law Spectral Conditions”. In: *Journal of Machine Learning Research (JMLR)* 25, 81:1–81:78.

Pauli Virtanen, Ralf Gommers, Travis E. Oliphant, Matt Haberland, Tyler Reddy, David Cournapeau, Evgeni Burovski, Pearu Peterson, Warren Weckesser, Jonathan Bright, Stéfan J. van der Walt, Matthew Brett, Joshua Wilson, K. Jarrod Millman, Nikolay Mayorov, Andrew R. J. Nelson, Eric Jones, Robert Kern, Eric Larson, C J Carey, İlhan Polat, Yu Feng, Eric W. Moore, Jake VanderPlas, Denis Laxalde, Josef Perktold, Robert Cimrman, Ian Henriksen, E. A. Quintero, Charles R. Harris, Anne M. Archibald, Antônio H. Ribeiro, Fabian Pedregosa, Paul van Mulbregt, and SciPy 1.0 Contributors (2020). “SciPy 1.0: Fundamental Algorithms for Scientific Computing in Python”. In: *Nature Methods* 17, pp. 261–272.

Ke Liang Xiao, Noah Marshall, Atish Agarwala, and Elliot Paquette (2024). “Exact Risk Curves of signSGD in High-Dimensions: Quantifying Preconditioning and Noise-Compression Effects”. [arXiv/2411.12135](https://arxiv.org/abs/2411.12135).

Ge Yang, Edward J. Hu, Igor Babuschkin, Szymon Sidor, Xiaodong Liu, David Farhi, Nick Ryder, Jakub Pachocki, Weizhu Chen, and Jianfeng Gao (2021). “(Tensor Program V) Tuning Large Neural Networks via Zero-Shot Hyperparameter Transfer”. In: *Neural Information Processing Systems (NeurIPS)*.

Yushun Zhang, Congliang Chen, Ziniu Li, Tian Ding, Chenwei Wu, Diederik P. Kingma, Yinyu Ye, Zhi-Quan Luo, and Ruoyu Sun (2025). “Adam-mini: Use Fewer Learning Rates To Gain More”. In: *International Conference on Learning Representations (ICLR)*.

Rosie Zhao, Depen Morwani, David Brandfonbrener, Nikhil Vyas, and Sham M. Kakade (2025). “Deconstructing What Makes a Good Optimizer for Autoregressive Language Models”. In: *International Conference on Learning Representations (ICLR)*.

Zhenxun Zhuang, Mingrui Liu, Ashok Cutkosky, and Francesco Orabona (2022). “Understanding AdamW through Proximal Methods and Scale-Freeness”. In: *Transactions of Machine Learning Research (TMLR)*.

## NeurIPS Paper Checklist

The checklist is designed to encourage best practices for responsible machine learning research, addressing issues of reproducibility, transparency, research ethics, and societal impact. Do not remove the checklist: **The papers not including the checklist will be desk rejected.** The checklist should follow the references and follow the (optional) supplemental material. The checklist does NOT count towards the page limit.

Please read the checklist guidelines carefully for information on how to answer these questions. For each question in the checklist:

- You should answer [Yes], [No], or [NA].
- [NA] means either that the question is Not Applicable for that particular paper or the relevant information is Not Available.
- Please provide a short (1–2 sentence) justification right after your answer (even for NA).

**The checklist answers are an integral part of your paper submission.** They are visible to the reviewers, area chairs, senior area chairs, and ethics reviewers. You will be asked to also include it (after eventual revisions) with the final version of your paper, and its final version will be published with the paper.

The reviewers of your paper will be asked to use the checklist as one of the factors in their evaluation. While "[Yes]" is generally preferable to "[No]", it is perfectly acceptable to answer "[No]" provided a proper justification is given (e.g., "error bars are not reported because it would be too computationally expensive" or "we were unable to find the license for the dataset we used"). In general, answering "[No]" or "[NA]" is not grounds for rejection. While the questions are phrased in a binary way, we acknowledge that the true answer is often more nuanced, so please just use your best judgment and write a justification to elaborate. All supporting evidence can appear either in the main paper or the supplemental material, provided in appendix. If you answer [Yes] to a question, in the justification please point to the section(s) where related material for the question can be found.

IMPORTANT, please:

- **Delete this instruction block, but keep the section heading “NeurIPS Paper Checklist”,**
- **Keep the checklist subsection headings, questions/answers and guidelines below.**
- **Do not modify the questions and only use the provided macros for your answers.**

### 1. Claims

Question: Do the main claims made in the abstract and introduction accurately reflect the paper’s contributions and scope?

Answer: [Yes]

Justification: The main claim of the abstract refers to the statement of [Theorems 3.1](#) and [4.5](#).

Guidelines:

- The answer NA means that the abstract and introduction do not include the claims made in the paper.
- The abstract and/or introduction should clearly state the claims made, including the contributions made in the paper and important assumptions and limitations. A No or NA answer to this question will not be perceived well by the reviewers.
- The claims made should match theoretical and experimental results, and reflect how much the results can be expected to generalize to other settings.
- It is fine to include aspirational goals as motivation as long as it is clear that these goals are not attained by the paper.

### 2. Limitations

Question: Does the paper discuss the limitations of the work performed by the authors?

Answer: [Yes]

Justification: The limitations are discussed in the conclusion section.

Guidelines:

- The answer NA means that the paper has no limitation while the answer No means that the paper has limitations, but those are not discussed in the paper.
- The authors are encouraged to create a separate "Limitations" section in their paper.
- The paper should point out any strong assumptions and how robust the results are to violations of these assumptions (e.g., independence assumptions, noiseless settings, model well-specification, asymptotic approximations only holding locally). The authors should reflect on how these assumptions might be violated in practice and what the implications would be.
- The authors should reflect on the scope of the claims made, e.g., if the approach was only tested on a few datasets or with a few runs. In general, empirical results often depend on implicit assumptions, which should be articulated.
- The authors should reflect on the factors that influence the performance of the approach. For example, a facial recognition algorithm may perform poorly when image resolution is low or images are taken in low lighting. Or a speech-to-text system might not be used reliably to provide closed captions for online lectures because it fails to handle technical jargon.
- The authors should discuss the computational efficiency of the proposed algorithms and how they scale with dataset size.
- If applicable, the authors should discuss possible limitations of their approach to address problems of privacy and fairness.
- While the authors might fear that complete honesty about limitations might be used by reviewers as grounds for rejection, a worse outcome might be that reviewers discover limitations that aren't acknowledged in the paper. The authors should use their best judgment and recognize that individual actions in favor of transparency play an important role in developing norms that preserve the integrity of the community. Reviewers will be specifically instructed to not penalize honesty concerning limitations.

### 3. Theory assumptions and proofs

Question: For each theoretical result, does the paper provide the full set of assumptions and a complete (and correct) proof?

Answer: [Yes]

Justification: The problem setting and main assumption are given in [Section 2](#). The sketch of the proof for the main theorems is given in the main paper after [Theorem 3.1](#) and [Theorem 4.5](#) for one case covered by the theorem, and the other cases are describe in [Appendix C](#) and [Appendix D](#).

Guidelines:

- The answer NA means that the paper does not include theoretical results.
- All the theorems, formulas, and proofs in the paper should be numbered and cross-referenced.
- All assumptions should be clearly stated or referenced in the statement of any theorems.
- The proofs can either appear in the main paper or the supplemental material, but if they appear in the supplemental material, the authors are encouraged to provide a short proof sketch to provide intuition.
- Inversely, any informal proof provided in the core of the paper should be complemented by formal proofs provided in appendix or supplemental material.
- Theorems and Lemmas that the proof relies upon should be properly referenced.

### 4. Experimental result reproducibility



Question: Does the paper fully disclose all the information needed to reproduce the main experimental results of the paper to the extent that it affects the main claims and/or conclusions of the paper (regardless of whether the code and data are provided or not)?

Answer: [Yes]

Justification: The experimental details are described in [Appendix A](#)

Guidelines:

- The answer NA means that the paper does not include experiments.
- If the paper includes experiments, a No answer to this question will not be perceived well by the reviewers: Making the paper reproducible is important, regardless of whether the code and data are provided or not.
- If the contribution is a dataset and/or model, the authors should describe the steps taken to make their results reproducible or verifiable.
- Depending on the contribution, reproducibility can be accomplished in various ways. For example, if the contribution is a novel architecture, describing the architecture fully might suffice, or if the contribution is a specific model and empirical evaluation, it may be necessary to either make it possible for others to replicate the model with the same dataset, or provide access to the model. In general, releasing code and data is often one good way to accomplish this, but reproducibility can also be provided via detailed instructions for how to replicate the results, access to a hosted model (e.g., in the case of a large language model), releasing of a model checkpoint, or other means that are appropriate to the research performed.
- While NeurIPS does not require releasing code, the conference does require all submissions to provide some reasonable avenue for reproducibility, which may depend on the nature of the contribution. For example
  - (a) If the contribution is primarily a new algorithm, the paper should make it clear how to reproduce that algorithm.
  - (b) If the contribution is primarily a new model architecture, the paper should describe the architecture clearly and fully.
  - (c) If the contribution is a new model (e.g., a large language model), then there should either be a way to access this model for reproducing the results or a way to reproduce the model (e.g., with an open-source dataset or instructions for how to construct the dataset).
  - (d) We recognize that reproducibility may be tricky in some cases, in which case authors are welcome to describe the particular way they provide for reproducibility. In the case of closed-source models, it may be that access to the model is limited in some way (e.g., to registered users), but it should be possible for other researchers to have some path to reproducing or verifying the results.

## 5. Open access to data and code

Question: Does the paper provide open access to the data and code, with sufficient instructions to faithfully reproduce the main experimental results, as described in supplemental material?

Answer: [Yes]

Justification: The code is available in the supplementary material. The data used is freely available and the experimental details are given in [Appendix A](#).

Guidelines:

- The answer NA means that paper does not include experiments requiring code.
- Please see the NeurIPS code and data submission guidelines (<https://nips.cc/public/guides/CodeSubmissionPolicy>) for more details.

- While we encourage the release of code and data, we understand that this might not be possible, so “No” is an acceptable answer. Papers cannot be rejected simply for not including code, unless this is central to the contribution (e.g., for a new open-source benchmark).
- The instructions should contain the exact command and environment needed to run to reproduce the results. See the NeurIPS code and data submission guidelines (<https://nips.cc/public/guides/CodeSubmissionPolicy>) for more details.
- The authors should provide instructions on data access and preparation, including how to access the raw data, preprocessed data, intermediate data, and generated data, etc.
- The authors should provide scripts to reproduce all experimental results for the new proposed method and baselines. If only a subset of experiments are reproducible, they should state which ones are omitted from the script and why.
- At submission time, to preserve anonymity, the authors should release anonymized versions (if applicable).
- Providing as much information as possible in supplemental material (appended to the paper) is recommended, but including URLs to data and code is permitted.

## 6. Experimental setting/details

Question: Does the paper specify all the training and test details (e.g., data splits, hyper-parameters, how they were chosen, type of optimizer, etc.) necessary to understand the results?

Answer: [Yes]

Justification: The experimental details are given in [Appendix A](#)

Guidelines:

- The answer NA means that the paper does not include experiments.
- The experimental setting should be presented in the core of the paper to a level of detail that is necessary to appreciate the results and make sense of them.
- The full details can be provided either with the code, in appendix, or as supplemental material.

## 7. Experiment statistical significance

Question: Does the paper report error bars suitably and correctly defined or other appropriate information about the statistical significance of the experiments?

Answer: [NA]

Justification: The experiments in the paper are deterministic.

Guidelines:

- The answer NA means that the paper does not include experiments.
- The authors should answer "Yes" if the results are accompanied by error bars, confidence intervals, or statistical significance tests, at least for the experiments that support the main claims of the paper.
- The factors of variability that the error bars are capturing should be clearly stated (for example, train/test split, initialization, random drawing of some parameter, or overall run with given experimental conditions).
- The method for calculating the error bars should be explained (closed form formula, call to a library function, bootstrap, etc.)
- The assumptions made should be given (e.g., Normally distributed errors).
- It should be clear whether the error bar is the standard deviation or the standard error of the mean.

- It is OK to report 1-sigma error bars, but one should state it. The authors should preferably report a 2-sigma error bar than state that they have a 96% CI, if the hypothesis of Normality of errors is not verified.
- For asymmetric distributions, the authors should be careful not to show in tables or figures symmetric error bars that would yield results that are out of range (e.g. negative error rates).
- If error bars are reported in tables or plots, The authors should explain in the text how they were calculated and reference the corresponding figures or tables in the text.

## 8. Experiments compute resources

Question: For each experiment, does the paper provide sufficient information on the computer resources (type of compute workers, memory, time of execution) needed to reproduce the experiments?

Answer: [No]

Justification: The experiments in the paper are lightweight and did not require the use of high performance compute resources.

Guidelines:

- The answer NA means that the paper does not include experiments.
- The paper should indicate the type of compute workers CPU or GPU, internal cluster, or cloud provider, including relevant memory and storage.
- The paper should provide the amount of compute required for each of the individual experimental runs as well as estimate the total compute.
- The paper should disclose whether the full research project required more compute than the experiments reported in the paper (e.g., preliminary or failed experiments that didn't make it into the paper).

## 9. Code of ethics

Question: Does the research conducted in the paper conform, in every respect, with the NeurIPS Code of Ethics <https://neurips.cc/public/EthicsGuidelines>?

Answer: [Yes]

Justification: The research conducted in the paper conforms with the NeurIPS Code of Ethics.

Guidelines:

- The answer NA means that the authors have not reviewed the NeurIPS Code of Ethics.
- If the authors answer No, they should explain the special circumstances that require a deviation from the Code of Ethics.
- The authors should make sure to preserve anonymity (e.g., if there is a special consideration due to laws or regulations in their jurisdiction).

## 10. Broader impacts

Question: Does the paper discuss both potential positive societal impacts and negative societal impacts of the work performed?

Answer: [NA]

Justification: The focus of the paper is on a mathematical description of the convergence rate of optimization algorithms. While this theory improves our understanding of optimization algorithms and could lead to algorithmic developments that make it easier to develop machine learning models, we have not identified relevant societal impact specific to this work.

Guidelines:

- The answer NA means that there is no societal impact of the work performed.
- If the authors answer NA or No, they should explain why their work has no societal impact or why the paper does not address societal impact.
- Examples of negative societal impacts include potential malicious or unintended uses (e.g., disinformation, generating fake profiles, surveillance), fairness considerations (e.g., deployment of technologies that could make decisions that unfairly impact specific groups), privacy considerations, and security considerations.
- The conference expects that many papers will be foundational research and not tied to particular applications, let alone deployments. However, if there is a direct path to any negative applications, the authors should point it out. For example, it is legitimate to point out that an improvement in the quality of generative models could be used to generate deepfakes for disinformation. On the other hand, it is not needed to point out that a generic algorithm for optimizing neural networks could enable people to train models that generate Deepfakes faster.
- The authors should consider possible harms that could arise when the technology is being used as intended and functioning correctly, harms that could arise when the technology is being used as intended but gives incorrect results, and harms following from (intentional or unintentional) misuse of the technology.
- If there are negative societal impacts, the authors could also discuss possible mitigation strategies (e.g., gated release of models, providing defenses in addition to attacks, mechanisms for monitoring misuse, mechanisms to monitor how a system learns from feedback over time, improving the efficiency and accessibility of ML).

## 11. Safeguards

Question: Does the paper describe safeguards that have been put in place for responsible release of data or models that have a high risk for misuse (e.g., pretrained language models, image generators, or scraped datasets)?

Answer: [NA]

Justification: The paper does not release data or models.

Guidelines:

- The answer NA means that the paper poses no such risks.
- Released models that have a high risk for misuse or dual-use should be released with necessary safeguards to allow for controlled use of the model, for example by requiring that users adhere to usage guidelines or restrictions to access the model or implementing safety filters.
- Datasets that have been scraped from the Internet could pose safety risks. The authors should describe how they avoided releasing unsafe images.
- We recognize that providing effective safeguards is challenging, and many papers do not require this, but we encourage authors to take this into account and make a best faith effort.

## 12. Licenses for existing assets

Question: Are the creators or original owners of assets (e.g., code, data, models), used in the paper, properly credited and are the license and terms of use explicitly mentioned and properly respected?

Answer: [Yes]

Justification: The assets used are described in [Appendix A](#).

Guidelines:

- The answer NA means that the paper does not use existing assets.
- The authors should cite the original paper that produced the code package or dataset.

- The authors should state which version of the asset is used and, if possible, include a URL.
- The name of the license (e.g., CC-BY 4.0) should be included for each asset.
- For scraped data from a particular source (e.g., website), the copyright and terms of service of that source should be provided.
- If assets are released, the license, copyright information, and terms of use in the package should be provided. For popular datasets, [paperswithcode.com/datasets](https://paperswithcode.com/datasets) has curated licenses for some datasets. Their licensing guide can help determine the license of a dataset.
- For existing datasets that are re-packaged, both the original license and the license of the derived asset (if it has changed) should be provided.
- If this information is not available online, the authors are encouraged to reach out to the asset's creators.

### 13. New assets

Question: Are new assets introduced in the paper well documented and is the documentation provided alongside the assets?

Answer: [NA]

Justification: The paper does not introduce new assets.

Guidelines:

- The answer NA means that the paper does not release new assets.
- Researchers should communicate the details of the dataset/code/model as part of their submissions via structured templates. This includes details about training, license, limitations, etc.
- The paper should discuss whether and how consent was obtained from people whose asset is used.
- At submission time, remember to anonymize your assets (if applicable). You can either create an anonymized URL or include an anonymized zip file.

### 14. Crowdsourcing and research with human subjects

Question: For crowdsourcing experiments and research with human subjects, does the paper include the full text of instructions given to participants and screenshots, if applicable, as well as details about compensation (if any)?

Answer: [NA]

Justification: The paper does not involve crowdsourcing nor research with human subjects.

Guidelines:

- The answer NA means that the paper does not involve crowdsourcing nor research with human subjects.
- Including this information in the supplemental material is fine, but if the main contribution of the paper involves human subjects, then as much detail as possible should be included in the main paper.
- According to the NeurIPS Code of Ethics, workers involved in data collection, curation, or other labor should be paid at least the minimum wage in the country of the data collector.

### 15. Institutional review board (IRB) approvals or equivalent for research with human subjects

Question: Does the paper describe potential risks incurred by study participants, whether such risks were disclosed to the subjects, and whether Institutional Review Board (IRB)

739 approvals (or an equivalent approval/review based on the requirements of your country or  
740 institution) were obtained?

741 Answer: [NA]

742 Justification: The paper does not involve human subjects and no IRB approval is required.

743 Guidelines:

- 744 • The answer NA means that the paper does not involve crowdsourcing nor research with  
745 human subjects.
- 746 • Depending on the country in which research is conducted, IRB approval (or equivalent)  
747 may be required for any human subjects research. If you obtained IRB approval, you  
748 should clearly state this in the paper.
- 749 • We recognize that the procedures for this may vary significantly between institutions  
750 and locations, and we expect authors to adhere to the NeurIPS Code of Ethics and the  
751 guidelines for their institution.
- 752 • For initial submissions, do not include any information that would break anonymity (if  
753 applicable), such as the institution conducting the review.

## 754 16. Declaration of LLM usage

755 Question: Does the paper describe the usage of LLMs if it is an important, original, or  
756 non-standard component of the core methods in this research? Note that if the LLM is used  
757 only for writing, editing, or formatting purposes and does not impact the core methodology,  
758 scientific rigor, or originality of the research, declaration is not required.

759 Answer: [NA]

760 Justification: The core contribution of this paper does not rely on LLMs.

761 Guidelines:

- 762 • The answer NA means that the core method development in this research does not  
763 involve LLMs as any important, original, or non-standard components.
- 764 • Please refer to our LLM policy (<https://neurips.cc/Conferences/2025/LLM>)  
765 for what should or should not be described.



# Supplementary Material

The supplementary material is organized as follows.

- [Appendix A](#) gives experimental details and information on how to reproduce the figures.
- [Appendix B](#) compares our results to standard convergence rates in the literature.
- [Appendix C](#) gives the main results for gradient descent [Theorem 3.1](#)
- [Appendix D](#) gives the main results for sign descent [Theorem 4.5](#)
- [Appendix E](#) gives the derivation for the time-to- $\varepsilon$  results of [Theorem 1.1](#)

## A Experimental details

This section goes over the technical details of the experiments needed to reproduce the figures.

### A.1 Computational complexity

We use  $d$  to denote the size of the vocabulary, but the number of parameters  $\mathbf{W}$  is  $d^2$  as we have to learn the conditional probability table  $\pi_{k|j}$ . As the number of iterations  $t$  has to scale with dimension, the problem scales in  $d^3$ , which becomes prohibitive fast. To circumvent this issue, we use the fact that the training dynamics of gradient descent and sign descent on data following [Assumption 4.1](#) can be simulated in  $O(d)$ . The error after  $t$  iterations can then be computed in closed-form if initialized at 0, making it possible to compute the loss after  $t$  steps without computing the intermediate steps.

**Proposition A.1** (Reduction of the dynamics for gradient descent). *Under [Assumption 2.3](#), the dynamics of gradient descent with step-size  $1/\pi_1$  can be computed in  $O(d)$  as*

$$r_d(t) := \frac{\mathcal{L}_d(t) - \mathcal{L}_d^*}{\mathcal{L}_d(0) - \mathcal{L}_d^*} = \frac{1}{\sum_{k=1}^d k^{-\alpha}} \sum_{k=1}^d \frac{1}{k^\alpha} \left(1 - \frac{1}{k^\alpha}\right)^{2t}.$$

*Proof.* We use the the dynamics using the eigendecomposition notation presented in [Section 2](#),

$$r_d(t) = \mathcal{L}_d(t) - \mathcal{L}_d^* = \sum_{i=1}^d \sum_{j=1}^d \lambda_{ij} \delta_{ij}(t)^2, \quad \text{and} \quad \delta_{ij}(t) = (1 - \lambda_{ij})^t \delta_{ij}(0).$$

Using [Assumption 2.3](#) gives that  $\lambda_{ij}$  is independent of  $j$  and  $\delta_{ij}$  is independent of  $i$  as

$$\lambda_{ij} = \pi_i = \frac{1}{z i^\alpha} \quad \delta_{ij}(0) = \pi_{\rho_i(j), i} = \frac{1}{z j^\alpha} \quad \text{where} \quad z = \sum_{k=1}^d \frac{1}{k^\alpha}.$$

Plugging in those together and using that the step-size is  $\eta = \pi_1 = 1/z$  gives

$$\begin{aligned} \frac{\mathcal{L}_d(t) - \mathcal{L}_d^*}{\mathcal{L}_d(0) - \mathcal{L}_d^*} &= \frac{\sum_{i=1}^d \sum_{j=1}^d \frac{1}{z i^\alpha} \left(1 - \frac{1}{i^\alpha}\right)^{2t} \delta_{ij}(0)^2}{\sum_{i=1}^d \sum_{j=1}^d \frac{1}{z i^\alpha} \delta_{ij}(0)^2}, \\ &= \frac{\sum_{i=1}^d \frac{1}{i^\alpha} \left(1 - \frac{1}{i^\alpha}\right)^{2t} \sum_{j=1}^d \delta_{ij}(0)^2}{\sum_{i=1}^d \frac{1}{i^\alpha} \sum_{j=1}^d \lambda_{ij} \delta_{ij}(0)^2} = \frac{\sum_{i=1}^d \frac{1}{i^\alpha} \left(1 - \frac{1}{i^\alpha}\right)^{2t}}{\sum_{i=1}^d \frac{1}{i^\alpha}}. \quad \square \end{aligned}$$

**Proposition A.2** (Reduction of the dynamics for sign descent). *Under [Assumption 2.3](#), the simplified dynamics of sign descent ([Assumption 4.1](#)) with step-size  $\eta(T, \phi) = 1/zT\phi^\alpha$  following the reparameterization of [Proposition 4.3](#) where  $z = \sum_{k=1}^d k^{-\alpha}$  can be computed in  $O(d)$  as*

$$r_d(T, \phi) := \frac{\mathcal{L}_d(T, \eta(T, \phi)) - \mathcal{L}_d^*}{\mathcal{L}_d(0) - \mathcal{L}_d^*} = \frac{1}{\sum_{k=1}^d k^{2\alpha}} \sum_{k=1}^d \left( \begin{cases} \frac{1}{k^\alpha} - \frac{1}{\phi^\alpha} & \text{if } |\delta_{ij}(T-1)| - \eta \geq 0, \\ \frac{1}{2\phi^\alpha} & \text{otherwise,} \end{cases} \right)^2,$$

*Proof.* Using the same derivation as above for [Proposition A.1](#) but using the update dynamics assumed in [Assumption 4.1](#). Note that those dynamics imply that  $\delta_{ij}(T)$  is independent of  $i$ . Writing  $\Delta_j =$

792  $\delta_{ij}(T)$  for any  $i$  and using that  $\sum_{i=1}^d \pi_i = 1$ , we have

$$\frac{\mathcal{L}_d(T) - \mathcal{L}_d^*}{\mathcal{L}_d(0) - \mathcal{L}_d^*} = \frac{\sum_{i=1}^d \sum_{j=1}^d \lambda_{ij} \delta_{ij}(T)^2}{\sum_{i=1}^d \sum_{j=1}^d \lambda_{ij} \delta_{ij}(0)^2} = \frac{\sum_{i=1}^d \sum_{j=1}^d \pi_i \Delta_j(T)^2}{\sum_{i=1}^d \sum_{j=1}^d \pi_i \Delta_j(0)^2} = \frac{\sum_{j=1}^d \Delta_j(T)^2}{\sum_{j=1}^d \Delta_j(0)^2}.$$

793 Expanding  $\Delta_j(T)$  using [Assumption 4.1](#) gives the result.  $\square$

794 For the real data experiments in [Fig. 2](#), the dynamics cannot be reduced to a  $O(d)$ . We still use the  
 795 fact that the dynamics can be computed in closed-form to avoid running  $t$  steps of gradient/sign  
 796 descent. For sign descent, we use the following equation for the loss after  $t$  steps of sign descent (not  
 797 the simpler model of [Assumption 2.3](#)) by computing the point at which the loss oscillates.

798 **Proposition A.3.** *Under the dynamics of sign descent with step-size  $\eta$ ,*

$$\delta_{ij}(t+1) = \delta_{ij}(t) - \eta \operatorname{sign}(\delta_{ij}(t)),$$

799 *the distance after  $t$  steps is given by*

$$\delta_{ij}(t) = \begin{cases} \delta_{ij}(0) - \eta t & \text{if } t \leq T_{\text{switch}}, \\ c_{ij} & \text{if } t - T_{\text{switch}} \text{ is odd,} \\ c_{ij} - \eta & \text{if } t - T_{\text{switch}} \text{ is even,} \end{cases} \quad \text{where} \quad \begin{aligned} T_{\text{switch}} &= \lfloor \delta_{ij}(0)/\eta \rfloor, \\ c_{ij} &= \delta_{ij}(0) - T_{\text{switch}}\eta. \end{aligned}$$

## 800 A.2 Additional details about the figures

801 [Fig. 1](#) shows the dynamics of gradient descent on [Problem 2.1](#) on data satisfying [Assumption 2.3](#).

802 [Fig. 2](#) shows the dynamics on real data on the OpenWebText dataset (Gokaslan et al., 2019). Using the  
 803 SentencePiece (Kudo and Richardson, 2018) implementation of BPE Sennrich et al., 2016, we train  
 804 tokenizers with vocabulary sizes of 1 000, 3 612, 10 000 and 31 622 tokens on a the first 2 000 000  
 805 entries of the dataset with a maximum sentence length of 16 768. We compute the frequencies and  
 806 conditional frequency tables for each vocabulary size using the entire dataset. We use the closed form  
 807 formulas for the loss after  $t$  steps using  $O(d^2)$  computation detailed in the previous section to avoid  
 808 having to run gradient and sign descent on those large models.

809 Gradient descent uses the empirically-derived step-size of  $1/\pi_1$ . For sign descent, for a given time  
 810 horizon  $T$ , we optimize over the step-size numerically. Because the loss after  $T$  steps as a function  
 811 of the step-size is unimodal, we use the default bounded bracketing method in scipy (Virtanen  
 812 et al., 2020, `minimize_scalar`) starting with the interval  $[\eta_{\min}/d, d\eta_{\max}]$  where  $\eta_{\min}, \eta_{\max}$  are the  
 813 bounds derived in [Proposition 4.3](#). The optimal step-size can vary drastically if it is computed on  
 814 even or odd iterations as the loss oscillates. To avoid this issue, we only show even iterations.

815 [Fig. 3](#) shows the frequencies computed as for [Fig. 2](#) for the largest vocabulary size,  $d = 31\,622$ .

816 **The rightmost plot of [Fig. 5](#)** shows the simplified dynamics of sign descent.

817 [Fig. 4](#), [Fig. 6](#) and [Fig. 7](#) show the convergence of the loss in  $d$  dimension computed using the  
 818 equations in [Appendix A.1](#). For sign descent, the best step-size is obtained by grid search. We know  
 819 the optimal step-size satisfies  $\phi \in [1, d]$  ([Proposition 4.3](#)), so let  $\phi = d^x$  where  $x$  comes from a  
 820 logarithmically spaced grid-search on  $x$  from  $-10$  to  $0$ , taking every  $1/32$ th powers;

$$\phi \in \{d^x : x \in \{10^{-10}, 10^{-10+\frac{1}{32}}, 10^{-10+\frac{2}{32}}, \dots, 10^0\}\}.$$

## B Comparison with worst-case rates

In this section, we compare our rates against results obtained using classical analyses to highlight the benefit of the asymptotic analysis in capturing the dependence on dimension. Our goal is not to imply those bounds are poor; each of the work cited below studied a specific problem and the assumptions were selected to highlight the impact of the condition number, non-convexity, variance, or other issue. However, due to their worst-case generality, existing results do not capture the dimension dependence on the problem of the linear bigram problem (Problem 2.1) with Zipf-distributed frequencies (Assumption 2.3) and predict worse behavior than actually observed.

In this section, we focus on Zipf-distributed data ( $\alpha = 1$ ) as it is the most relevant to text data. To simplify notation, we assume that the conditional frequencies directly follow a power-law  $\pi_{k|i} \propto 1/k$ , instead of assuming that there exists a reordering  $\rho_i$  such that  $\pi_{\rho_i(k)|i} \propto 1/k$  as in Assumption 2.3. This reordering does not affect the dynamics of the loss and can be ignored without loss of generality.

### B.1 Standard smooth, (strongly-)convex rates.

Classical results in smooth, convex optimization are derived under the assumption that the objective function  $\mathcal{L}_d$  is  $L$ -smooth and  $\mu$ -strongly convex with  $\mu \geq 0$ . We write the function rates in matrix form for the loss  $\mathcal{L}_d$  defined in Problem 2.1, but this could equivalently be transformed to a vector form using  $\|\mathbf{x} - \mathbf{x}_*\|_2^2 = \|\mathbf{W} - \mathbf{W}_*\|_F^2$  if  $\mathbf{x} = \text{vec}(\mathbf{W})$  and  $\mathbf{x}_* = \text{vec}(\mathbf{W}_*)$  where  $\text{vec}$  stacks the columns of  $\mathbf{W}$  as a single vector. For a twice-differentiable function, this is equivalent to assuming that the eigenvalues of the Hessian are bounded by  $\mu \leq \lambda_{ij} \leq L$  for all  $i, j \in [d]$  at every possible input. We compare against simple forms available in this setting (Nesterov (2018, Cor. 2.1.2), Boyd and Vandenberghe (2004, Eq. 9.18)). While it is possible to slightly improve the constants in these bounds, these constants do not meaningfully affect the asymptotic behavior as  $d$  grows.

$$\mathcal{L}_d(t) - \mathcal{L}_d^* \leq \frac{2L\|\mathbf{W}_0 - \mathbf{W}_*\|_F^2}{t}, \quad \mathcal{L}_d(t) - \mathcal{L}_d^* \leq \left(1 - \frac{\mu}{L}\right)^t (\mathcal{L}_d(0) - \mathcal{L}_d^*).$$

To better compare these rates with our results, we normalize them by  $\mathcal{L}_d(0) - \mathcal{L}_d^*$ ,

$$\frac{\mathcal{L}_d(t) - \mathcal{L}_d^*}{\mathcal{L}_d(0) - \mathcal{L}_d^*} \leq \frac{L\|\mathbf{W}_0 - \mathbf{W}_*\|_F^2}{t(\mathcal{L}_d(0) - \mathcal{L}_d^*)} =: r_d^{\text{sub}}(t), \quad \frac{\mathcal{L}_d(t) - \mathcal{L}_d^*}{\mathcal{L}_d(0) - \mathcal{L}_d^*} \leq \left(1 - \frac{\mu}{L}\right)^t =: r_d^{\text{lin}}(t).$$

**Proposition B.1** (Values of the constants). *On Problem 2.1 with frequencies following a power-law with  $\alpha = 1$  (Assumption 2.3) initialized at  $\mathbf{W}_0 = 0$ , the smooth convex sublinear rate  $r_d^{\text{sub}}(t)$  and the smooth strongly-convex linear rate  $r_d^{\text{lin}}(t)$  are asymptotically equivalent to*

$$r_d^{\text{sub}}(t) \lesssim 2 \frac{d}{\log(d)} \frac{1}{t}, \quad r_d^{\text{lin}}(t) \lesssim \left(1 - \frac{1}{d}\right)^t.$$

*Proof.* The proof follow from substituting the constants with the values

$$\mu = \frac{1}{dz}, \quad L = \frac{1}{z}, \quad \|\mathbf{W}_0 - \mathbf{W}_*\|_F^2 = d(\mathcal{L}_d(\mathbf{W}_0) - \mathcal{L}_d^*).$$

where  $z = \sum_{k=1}^d 1/k \lesssim \log(d)$ . The eigenvalues are  $\lambda_{ij} = \pi_i = 1/zi$  after normalization, giving  $L = 1/z$  and  $\mu = 1/zd$ . Using that  $\delta_{ij}(0) = 1/zj$  gives the loss and distance at initialization,

$$\begin{aligned} \mathcal{L}_d(\mathbf{W}_0) - \mathcal{L}_d^* &= \sum_{i=1}^d \sum_{j=1}^d \lambda_{ij} \delta_{ij}(0)^2 = \sum_{i=1}^d \pi_i \sum_{j=1}^d \pi_j^2 = \sum_{j=1}^d \left(\frac{1}{zj}\right)^2, \\ \|\mathbf{W}_0 - \mathbf{W}_*\|^2 &= \sum_{i=1}^d \sum_{j=1}^d \delta_{ij}(0)^2 = d \sum_{j=1}^d \left(\frac{1}{zj}\right)^2 = d(\mathcal{L}_d(\mathbf{W}_0) - \mathcal{L}_d^*). \quad \square \end{aligned}$$

Both rates struggle to predict the progress in “early” iterations, when  $t$  is much smaller than  $d$ . The sublinear rate requires a scaling  $t \propto d/\log(d)$  while the linear rate predicts  $t \propto d$ . Neither captures the progress that can be made by running  $t = d^{1/2}$  iterations, which reaches an error of  $\varepsilon = 1/2$ . Instead, both rates predict no progress. We visualize the given rates in Fig. 8 after rescaling the number of

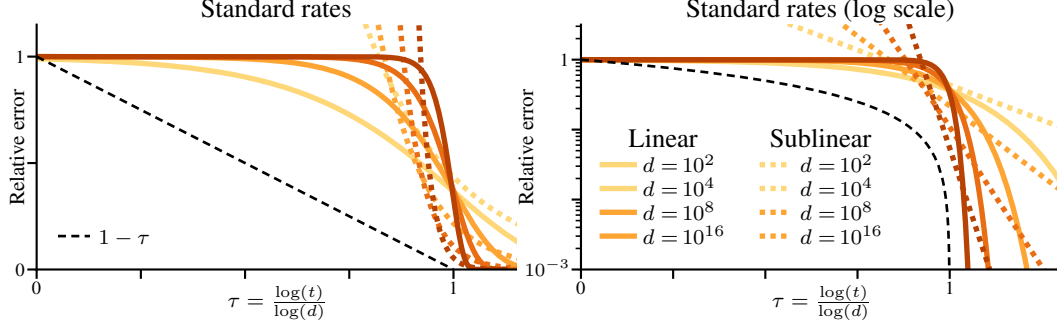

Figure 8: **Standard convergence rates don't capture the scaling in dimension.**

steps to our normalized time  $\tau = \log(t)/\log(d)$ . The linear and sublinear rates are not converging to  $r(\tau) = 1 - \tau$ . Instead, they exhibit a sharper and sharper transition between not predicting any progress for  $\tau < 1$  ( $r(\tau) \approx 1$  or  $r(\tau) > 1$ ) and that the problem is solved if  $\tau > 1$ .

## B.2 Rates for sign descent

Analyses on sign-like methods in the literature typically target more complex algorithms such as RMSProp (Tieleman and Hinton, 2012) or AdaGrad (Duchi et al., 2011) for Das et al. (2024) and Liu et al. (2025), or consider more general problems including non-convex functions for Bernstein et al. (2018) and Safaryan and Richtárik (2021). We are not aware of existing analyses that specifically target sign descent on diagonal quadratic problems such as Problem 2.1. This makes a direct comparison difficult. It might be that the rates described in those papers for the chosen problem setting or algorithm are tight. However, our message is that the resulting rates are too pessimistic even for a problem as simple as Problem 2.1 and suggest runtimes for sign descent that are off by a factor depending on the dimension.

The main difficulty in studying sign descent and sign-like methods more generally is the strong dependence on the coordinate system used. For Problem 2.1 the dynamics perfectly separate along coordinates which makes it possible to derive a closed form for the dynamics. Other works typically rely on assumptions on the Hessian that quantify how close to diagonal it is. For example, bound the Hessian with a diagonal matrix  $\mathbf{L}$ ,  $\mathbf{H} \preceq \mathbf{L}$  in Loewner ordering, and obtain rates that depend on the trace of  $\mathbf{L}$  (e.g., Bernstein et al., 2018; Liu et al., 2025). For Problem 2.1, the Hessian is diagonal and made of  $d$  diagonal copies of  $\mathbf{X}^\top \mathbf{X}/n = \text{Diag}([\pi_1, \dots, \pi_d])$ , thus  $\text{Tr}(\mathbf{L}) = \text{Tr}(\nabla^2 \mathcal{L}_d(\mathbf{W})) = d$ .

**Anisotropic smoothness and AdaGrad.** Using this assumption, Liu et al. (2020, Theorem 4.1) show the following convergence rate for AdaGrad. To simplify their results and show the rate in its best light, we assume there is no noise in the gradient ( $\|\sigma\|_1 = 0$  in their notation), that AdaGrad is run with the parameter  $\epsilon = 0$ , that the algorithm is run with projections onto the constrained set  $\mathcal{W} = \{\mathbf{W} : \|\mathbf{W}\|_\infty \leq \pi_1\}$  and that we initialize at  $\mathbf{W} = 0$ .

$$\mathcal{L}_d(t) - \mathcal{L}_d^* \leq \frac{\text{Tr}(\mathbf{L})\pi_1}{T}.$$

Normalizing the loss and simplifying the constants using the same approach as in Proposition B.1 gives the following asymptotic upper bound

$$\frac{\mathcal{L}_d(t) - \mathcal{L}_d^*}{\mathcal{L}_d(0) - \mathcal{L}_d^*} \leq r_d^{\text{Adagrad}}(t) := \frac{\text{Tr}(\mathbf{L})\pi_1}{T(\mathcal{L}_d(0) - \mathcal{L}_d^*)} \lesssim \frac{d \log(d)}{T} \frac{6}{\pi^2}.$$

Although we might expect Adagrad to outperform sign descent as it uses decreasing step-sizes to avoid the oscillations, this rate estimate that the number of iterations should scale with  $d \log(d)$  instead of the scaling of  $\sqrt{d}$  we find for sign descent.

**Preconditioning effect of Adam.** Das et al. (2024) study RMSProp, or Adam without momentum ( $\beta_1 = 0$ ) but with momentum on the moving average of the squared gradient. They use high-probability arguments to handle the dynamics of the preconditioner and random initialization. Their rate shows that Adam can perform better on diagonal quadratics if the condition num-

ber scales worse than linearly with the dimensionality, by replacing the condition number  $\kappa$  with  $\kappa_{\text{Adam}} = \min\{d_{\mathbf{W}} + 1, \kappa\}$  where  $d_{\mathbf{W}}$  is the dimensionality of  $\mathbf{W}$ . Assuming that their bound holds with probability 1 with  $\mathbf{W}_0 = 0$  and ignoring logarithmic factors in  $d$  and  $\epsilon$ , their rate for diagonal quadratics is (Das et al., 2024, Thm. 2)

$$\mathcal{L}_d(t) - \mathcal{L}_d^* \leq \frac{\epsilon^2}{2}, \quad \text{after} \quad t \geq \tilde{O}(\kappa_{\text{Adam}}).$$

Unfortunately, on [Problem 2.1](#) the dimensionality is  $d_{\mathbf{W}} = d^2$  while the condition number scales as  $\kappa = d$  with Zipfian eigenvalues ( $\alpha = 1$ ) so the proposed approach does not improve over gradient descent. Normalizing the loss and using the same approach as in [Proposition B.1](#) gives

$$\frac{\mathcal{L}_d(t) - \mathcal{L}_d^*}{\mathcal{L}_d(0) - \mathcal{L}_d^*} \leq \frac{\epsilon^2}{2}, \quad \text{after} \quad t \geq \tilde{O}(d).$$

This scaling predicts the same performance for Adam and gradient descent (up to log factors depending on  $d$  and  $\epsilon$  that we ignored) whereas our analysis shows a scaling of  $d^{1/2}$  for sign descent.

**Non-convex results.** Results in the non-convex setting (Bernstein et al., 2018; Balles et al., 2020; Safaryan and Richtárik, 2021; Liu et al., 2025) give convergence results to stationarity instead of convergence in optimality gap, measured using the 1-norm of the gradient instead of the Euclidean norm. Because  $\|\mathbf{v}\|_1^2 \leq \|\mathbf{v}\|_2^2 d$  for a  $d$ -dimensional vector  $\mathbf{v}$ , the time required to get the 1-norm small might be much worse than the time required to find a stationary point in Euclidean norm or to minimize the function value. To illustrate this point, we show that it is possible to have arbitrarily small relative error on [Problem 2.1](#) and arbitrarily large gradients when measured in 1-norm in high enough dimension.

**Proposition B.2.** On [Problem 2.1](#) with Zipf-distributed data ([Assumption 2.3](#) with  $\alpha = 1$ ), sign descent with simplified dynamics ([Assumption 4.1](#)) using the scaling  $t_d(\tau) = \tau d^{1/2}/2$  and  $\phi_d(\tau) = (1 + \tau^2)^{-1}$  satisfies for  $\tau > 2$

$$\frac{\mathcal{L}_d(\mathbf{W}_{t_d(\tau)}) - \mathcal{L}_d^*}{\mathcal{L}_d(\mathbf{W}_0) - \mathcal{L}_d^*} \lesssim \frac{1}{1 + \zeta(2\alpha)\tau^2}, \quad \frac{\|\text{vec}(\nabla \mathcal{L}_d(\mathbf{W}_{t_d(\tau)}))\|_1}{\|\text{vec}(\nabla \mathcal{L}_d(\mathbf{W}_0))\|_1} \lesssim C \frac{d^{1/2}}{\log(d)\tau} \text{ where } 1/2 < C < 1.$$

*Proof.* Computations similar to [Proposition 4.2](#) show that the 1-norm of the gradient is

$$\|\text{vec}(\nabla \mathcal{L}_d(\mathbf{W}_t))\|_1 = \sum_{k=1}^{k_*} (\pi_k - t\eta) + \sum_{k=k_*+1}^d \frac{\eta}{2}$$

where  $k_*$  is the number of directions that are still in the decreasing regime after  $T$  steps with step-size  $\eta$ . As  $\|\text{vec}(\nabla \mathcal{L}_d(\mathbf{W}_0))\|_1 = \sum_{k=1}^d \pi_k = 1$ , this expression is also the normalized 1-norm of the gradient. Using the parameterization  $\eta = 1/z t \phi$ , where  $z = \sum_{k=1}^d 1/k$ , we get the update

$$r_d(t) := \frac{\|\text{vec}(\nabla \mathcal{L}_d(\mathbf{W}_t))\|_1}{\|\text{vec}(\nabla \mathcal{L}_d(\mathbf{W}_0))\|_1} = \frac{\sum_{k=1}^{\lfloor \phi \rfloor} \left( \frac{1}{k} - \frac{1}{\phi} \right) + \sum_{k=\lfloor \phi \rfloor + 1}^d \frac{1}{2t\phi}}{z}$$

Using  $t_d(\tau) = \frac{1}{2}\tau d^{1/2}$  and  $1 < \phi_d(\tau) < 2$  for simplicity and that  $z \sim^d \log(d)$  gives

$$r_d(t) \lesssim \frac{d^{1/2}}{\log(d)\tau} C \text{ where } \frac{1}{2} < C < 1.$$

□

Getting the magnitude of the gradient in 1-norm smaller than a constant independent of  $d$  would require scaling  $t$  with  $d/\log(d)$ , whereas getting the same result for the relative error only requires scaling  $t$  with  $d^{1/2}$ .

### B.3 Source and capacity assumptions

The classical source/capacity condition have typically been used to describe risk bounds in learning theory for infinite dimensional kernel methods, random feature models or regression models when the dimension  $d$  grows (e.g., Caponnetto and Vito, 2007; Advani et al., 2020; Berthier et al., 2020; Bahri et al., 2021; Cui et al., 2021; Maloney et al., 2022; Paquette et al., 2024). Using the notation of Cui et al. (2021) where  $\Sigma$  is the covariance of the data and  $\theta_*$  is the solution, the typical assumption is that for parameters  $\alpha > 1, r \geq 0$  we have

$$\text{Tr}(\Sigma^{\frac{1}{\alpha}}) < \infty, \quad \theta_*^\top \Sigma^{1-2r} \theta_* < \infty.$$

For finite dimensionals system,  $\text{Tr}(\Sigma^{1/\alpha}) < \infty$  should be interpreted as  $\lim_{d \rightarrow \infty} \sum_{k=1}^d \lambda_k^{1/\alpha} < \infty$ , where  $\lambda_k$  are the eigenvalues of  $\Sigma$ . This implies that the data is “effectively” low-dimensional, even as  $d \rightarrow \infty$ . Cui et al. (2021) further assume that the eigenvalues of  $\Sigma$  and the components of  $\theta_*$  follow power laws,

$$\lambda_k = k^{-\alpha}, \quad [\theta_*]_k^2 = k^{-1-\alpha(2r-1)}.$$

Our setting follows a similar idea. The parameter  $\alpha$  corresponds to our power law parameter  $\alpha$  governing the conditional frequencies and the distance to the solution corresponds to the marginal probabilities. In terms of assumptions, the main difference is that we normalize the eigenvalues and the distance to the solutions as those represent frequencies, and that we allow for  $\alpha \leq 1$  to describe Zipf-distributed data. As we have  $d^2$  eigenvalues, where each distinct value is repeated  $c$  times, we could collapse to a  $d$ -dimensional system with distances to the solution summed to obtain

$$\lambda_k = \pi_k = \frac{1}{z} k^{-\alpha}, \quad [\theta_*]_k^2 = \sum_{j=1}^d \pi_{j|k}^2 = \frac{1}{z^2} \sum_{j=1}^d j^{-2\alpha}.$$

Up to the normalization constant  $z$ , we recover the source/capacity condition with the same  $\alpha$  and  $r = 1/2$  as the distance to the solution  $[\theta_*]_k^2$  is independent of  $k$ . The other main difference is that we use this setting to investigate the performance of deterministic optimization algorithms as Velikanov and Yarotsky (2024) instead of investigating risk bounds.



## C Proofs for gradient descent

This section gives the proof of [Theorem 3.1](#) for the scaling of gradient descent.

### C.1 Standard results

We start with standard results that are used in the subsequent proofs. The following classical relationships between sums and integrals of monotone functions will be used to bound the approximation error induced by analyzing the asymptotics of the integral instead of the sum.

**Lemma C.1** (Sum-Integral). *For a function  $f$  that is monotone on  $[a, b]$ ,*

$$\begin{aligned} \text{if } f \text{ is increasing on } [a, b], \quad & \sum_{i=a}^{b-1} f(i) \leq \int_a^b f(k) dk \leq \sum_{i=a+1}^b f(i), \\ \text{if } f \text{ is decreasing on } [a, b], \quad & \sum_{i=a+1}^b f(i) \leq \int_a^b f(k) dk \leq \sum_{i=a}^{b-1} f(i). \end{aligned}$$

To apply these sum-integral relationships to the dynamics of gradient descent in [Theorem 3.1](#), we need to describe when they are increasing or decreasing.

**Lemma C.2** (Unimodal sequence). *The sequence  $s(k) = k^{-\alpha}(1 - k^{-\alpha})^t$  is non-negative on  $k \geq 1$  and unimodal. It monotonically increases until  $k_* = (1 + t)^{1/\alpha}$ , then monotonically decreases.*

*Proof.* As  $s(k)$  is non-negative, we can instead look at its logarithm,

$$\begin{aligned} \log s(k) &= \log(N) - \alpha \log(k) + t \log(1 - k^{-\alpha}), \\ \frac{\partial}{\partial k} \log s(k) &= \alpha t \frac{k^{-\alpha-1}}{1 - k^{-\alpha}} - \frac{\alpha}{k} = \frac{\alpha t}{k(k^\alpha - 1)} - \frac{\alpha}{k} = \frac{\alpha(t-1)(k^\alpha - 1)}{k(k^\alpha - 1)}. \end{aligned}$$

The denominator is positive on  $k \geq 1$ , and the numerator is positive for small  $k$  until the derivative changes sign at  $\alpha t - \alpha(k^\alpha - 1) = 0$ , or  $k_* = (1 + t)^{1/\alpha}$ .  $\square$

At the partial sum  $H_{d,\alpha} = \sum_{k=1}^d k^{-\alpha}$ , appears in the proof of gradient and sign descent, we give its asymptotic behavior independently.

**Lemma C.3** (Normalizer Asymptotics). *As  $d$  grows, the partial sum  $H_{d,\alpha} = \sum_{k=1}^d k^{-\alpha}$  behaves as*

$$H_{d,\alpha} \stackrel{d}{\sim} \frac{1}{1-\alpha} d^{1-\alpha} \text{ if } \alpha < 1, \quad H_{d,1} \stackrel{d}{\sim} \log(d) \quad H_{d,\alpha} \stackrel{d}{\sim} \zeta(\alpha) \text{ if } \alpha > 1,$$

where  $\zeta$  is the zeta function, defined as the limit of  $H_{d,\alpha}$ ,  $\zeta(\alpha) = \sum_{k=1}^{\infty} k^{-\alpha} < \infty$  for  $\alpha > 1$ .

*Proof.* For  $\alpha > 1$ , the sum converges to  $\sum_{k=1}^{\infty} k^{-\alpha} = \zeta(\alpha)$ . For  $\alpha \leq 1$ , the sum diverges as  $d$  grows. As the sequence  $k^{-\alpha}$  is decreasing in  $k$ , we can use the [Sum-Integral Lemma \(C.1\)](#) to get

$$\int_1^{d+1} k^{-\alpha} dk \leq \sum_{k=1}^d k^{-\alpha} \leq 1 + \int_1^d k^{-\alpha} dk.$$

If  $\alpha < 1$ , the integrals evaluate to

$$\frac{((d+1)^{1-\alpha} - 1)}{1-\alpha} \leq \sum_{k=1}^d k^{-\alpha} \leq \frac{(d^{1-\alpha} - 1) + 1}{1-\alpha},$$

and both terms are asymptotically equivalent to  $d^{1-\alpha}/(1-\alpha)$  as  $d \rightarrow \infty$ . If  $\alpha = 1$ , this gives

$$\log(d+1) \leq \sum_{k=1}^d k^{-1} \leq \log(d) + 1.$$

Both terms are asymptotically equivalent to  $\log(d)$ .  $\square$

963 The main purpose of the [Sum-Integral Lemma \(C.1\)](#) and the [Unimodal Lemma \(C.2\)](#) is to bound on  
 964 the error incurred by approximating the sum with the integral form of the loss.

965 **Lemma C.4** (Approximating error). *The approximation error between the following sum and integral,*

$$S_d(t) = \sum_{k=1}^d s(k) \quad I_d(t) = \int_1^d s(k) dk \quad \text{where} \quad s(k) = k^{-\alpha}(1 - k^{-\alpha})^t$$

966 *can be bounded by the following error term,*

$$|S_d(t) - I_d(t)| \leq \delta_d(t) \quad \text{where} \quad \delta_d(t) := \begin{cases} \frac{1}{1+t} \left(1 - \frac{1}{1+t}\right)^t & \text{if } 1+t \leq d^\alpha, \\ \frac{1}{d^\alpha} \left(1 - \frac{1}{d^\alpha}\right)^t & \text{if } 1+t \geq d^\alpha. \end{cases} \quad (4)$$

967 *Proof.* By the [Unimodal Lemma \(C.2\)](#), the sequence  $s(k)$  is increasing until  $k_* = (1+t)^{1/\alpha}$  then  
 968 decreasing, which lets us use the [Sum-Integral Lemma \(C.1\)](#).

969 **For large  $t$ .** Suppose that  $t$  is sufficiently large such that  $k_* \geq d$  and  $1+t \geq d^\alpha$ , meaning that the  
 970 sequence  $s(k)$  is increasing on  $[1, d]$ . Then,

$$\int_1^d s(k) dk + s(1) \leq \sum_{k=1}^d s(k) \leq \int_1^d s(k) dk + s(d). \quad (5)$$

971 Using that  $s(1) = 0$  gives  $|I_d(t) - S_d(t)| \leq s(d)$  when  $t$  is large.

972 **For small  $t$ .** If  $t$  is small and  $k_* < d$  the sequence flips from increasing to decreasing on  $[1, d]$ . We  
 973 still use the same idea, but bound the increasing and the decreasing subsequences separately.

974 **Upper bound.** As the sequences  $s(k)$  in increasing on  $[1, k_*]$  and decreasing on  $[k_*, d]$ ,

$$\sum_{k=1}^{\lfloor k_* \rfloor - 1} s(k) \leq \int_1^{\lfloor k_* \rfloor} s(k) dk, \quad \sum_{k=\lfloor k_* \rfloor + 2}^d s(k) \leq \int_{\lfloor k_* \rfloor + 1}^d s(k) dk.$$

975 Summing both bounds and adding the remaining terms  $s(\lfloor k_* \rfloor), s(\lfloor k_* \rfloor + 1)$ ,

$$\sum_{k=1}^d s(k) \leq \int_1^{\lfloor k_* \rfloor} s(k) dk + \int_{\lfloor k_* \rfloor + 1}^d s(k) dk + s(\lfloor k_* \rfloor) + s(\lfloor k_* \rfloor + 1) \leq \int_1^d s(k) dk + s(k_*),$$

976 where the last inequality uses the following simplifications,

$$\begin{aligned} \min\{s(\lfloor k_* \rfloor), s(\lfloor k_* \rfloor + 1)\} &= \int_{\lfloor k_* \rfloor}^{\lfloor k_* \rfloor + 1} \min\{s(\lfloor k_* \rfloor), s(\lfloor k_* \rfloor + 1)\} dk \leq \int_{\lfloor k_* \rfloor}^{\lfloor k_* \rfloor + 1} s(k) dk, \\ \max\{s(\lfloor k_* \rfloor), s(\lfloor k_* \rfloor + 1)\} &\leq s(k_*). \end{aligned}$$

977 **Lower bound.** Now using the lower bound,

$$\int_1^{\lfloor k_* \rfloor} s(k) dk \leq \sum_{k=2}^{\lfloor k_* \rfloor} s(k), \quad \int_{\lfloor k_* \rfloor + 1}^d s(k) dk \leq \sum_{k=\lfloor k_* \rfloor + 1}^{d-1} s(k).$$

978 Summing both bounds, we can complete the integral by adding and subtracting  $\int_{\lfloor k_* \rfloor}^{\lfloor k_* \rfloor + 1} s(k) dk$  and  
 979 adding the remaining terms  $s(1)$  and  $s(d)$  to obtain

$$\sum_{k=1}^{\lfloor k_* \rfloor} s(k) \geq \int_1^d s(k) dk - \int_{\lfloor k_* \rfloor}^{\lfloor k_* \rfloor + 1} s(k) dk + s(1) + s(d) \geq \int_1^d s(k) dk - s(k_*) + s(d),$$

980 where the last inequality uses that  $s(1) = 0, s(k) \leq s(k_*)$ .

981 **Combining the results** for the small  $t$  regime gives

$$I_d(t) + s(k_*) \geq S_d(t) \geq I_d(t) - s(k_*) + s(d), \quad \text{so} \quad |I_d(t) - S_d(t)| \leq s(k_*).$$

982 **The final bound** in [Eq. \(4\)](#) expands  $s(x) = x^{-\alpha}(1 - x^{-\alpha})^t$  and replaces  $k_*$  by  $(1+t)^{\frac{1}{\alpha}}$ .  $\square$

## C.2 Scaling laws for gradient descent

We are now ready to move to the proof of [Theorem 3.1](#), for which we recall the theorem statement.

**Theorem 3.1** (Scaling for gradient descent). *On the bigram problem (Prob. 2.1) with distributions following a power law with exponent  $\alpha > 0$  ([Assumption 2.3](#)), gradient descent with a step-size  $1/\pi_1$ , with time scaling  $t_d(\tau)$  has the following asymptotic convergence rate ([Eq. \(2\)](#)).*

$$\begin{aligned} \text{If } \alpha < 1, \quad t_d(\tau) &= \frac{1}{2}\tau d^\alpha, & r(\tau) &= \frac{1-\alpha}{\alpha} E_{\frac{1}{\alpha}}(\tau) \sim \frac{1-\alpha}{\alpha} \frac{e^{-\tau}}{\tau+1}, \\ \text{if } \alpha = 1, \quad t_d(\tau) &= \frac{1}{2}d^\tau, & r(\tau) &= 1-\tau \quad \text{where } \tau \in [0, 1], \\ \text{if } \alpha > 1, \quad t_d(\tau) &= \tau, & r(\tau) &= \frac{B(1-\frac{1}{\alpha}, 1+2t)}{\alpha\zeta(\alpha)} \sim C \frac{1}{\tau^{1-\frac{1}{\alpha}}} \mathcal{L}_d(0), \end{aligned}$$

where  $\Gamma$  is the Gamma function,  $E_p$  is the generalized exponential integral,  $B$  is the Beta function, and  $\zeta$  is the zeta function ([DLMF](#), §5.2, §5.12 §8.19 §25.2), and  $C = \Gamma(1-\frac{1}{\alpha})/\alpha\zeta(\alpha)$ .

**Note: Typo in main text.** The case  $\alpha > 1$  in [Theorem 3.1](#) currently states the following statement with equality, which should instead be an asymptotic equivalence, and has an additional  $\mathcal{L}_d(0)$  factor.

$$\begin{aligned} r(\tau) &= \frac{B(1-\frac{1}{\alpha}, 1+2t)}{\alpha\zeta(\alpha)} \sim C \frac{1}{\tau^{1-\frac{1}{\alpha}}} \mathcal{L}_d(0), \\ \text{should have been } r(\tau) &\sim \frac{B(1-\frac{1}{\alpha}, 1+2t)}{\alpha\zeta(\alpha)} \sim C \frac{1}{\tau^{1-\frac{1}{\alpha}}}, \end{aligned}$$

*Proof sketch.* We first give a sketch of the proof, which will be formalized in the next lemmas. Based on the reduced dynamics for gradient descent in [Proposition A.1](#), we know that

$$r_d(t) = \frac{\mathcal{L}_d(t) - \mathcal{L}_d^*}{\mathcal{L}_d(0) - \mathcal{L}_d^*} = \frac{\sum_{k=1}^d k^{-\alpha}(1-k^{-\alpha})^t}{H_{d,\alpha}},$$

where  $H_{d,\alpha} = \sum_{k=1}^d k^{-\alpha}$ . Let  $S_d$  and  $I_d$  be the sum and integral variants of the denominator,

$$S_d(t) = \sum_{k=1}^d k^{-\alpha}(1-k^{-\alpha})^t \quad I_d(t) = \int_1^d k^{-\alpha}(1-k^{-\alpha})^t dk. \quad (6)$$

First, we establish in [Lemma C.5](#) that the integral form converges to the rate  $r(\tau)$  in [Theorem 3.1](#),

$$\lim_{d \rightarrow \infty} \frac{I_d(t_d(\tau))}{H_{d,\alpha}} = r(\tau).$$

Next, we show in [Lemma C.6](#) that the error incurred by approximating the sum  $S_d$  by the integral  $I_d$  is negligible, in the sense that  $|I_d(t) - S_d(t)| \leq \delta_d(t)$  and

$$\lim_{d \rightarrow \infty} \frac{\delta_d(t_d(\tau))}{I_d(t_d(\tau))} = 0 \quad \text{if } \alpha \leq 1, \quad \text{and} \quad \lim_{\tau \rightarrow \infty} \lim_{d \rightarrow \infty} \frac{\delta_d(t)}{I_d(t)} = 0 \quad \text{if } \alpha > 1.$$

This gives the results that

$$r(\tau) = \lim_{d \rightarrow \infty} \frac{I_d(t_d(\tau))}{H_{d,\alpha}} \text{ if } \alpha \leq 1, \quad \text{and} \quad r(t) \sim \lim_{d \rightarrow \infty} \frac{I_d(t)}{H_{d,\alpha}} \text{ if } \alpha > 1.$$

with the values of  $r(\tau)$  given in [Theorem 3.1](#). □

999 **Lemma C.5** (Asymptotics of the integrals). *Let  $I_d(t)$  be the integral form given in Eq. (6) and  $t_d(\tau)$*   
 1000 *be the scaling given in Theorem 3.1. The following limits hold.*

$$\begin{aligned} \text{If } \alpha < 1, \quad t_d(\tau) &= \frac{1}{2}\tau d^\alpha, \quad \lim_{d \rightarrow \infty} \frac{I_d(t_d(\tau))}{H_{d,\alpha}} = \frac{1-\alpha}{\alpha} E_{\frac{1}{\alpha}}(\tau) \sim \frac{1-\alpha}{\alpha} \frac{e^{-\tau}}{\tau+1}, \\ \text{if } \alpha = 1, \quad t_d(\tau) &= \frac{1}{2}d^\tau, \quad \lim_{d \rightarrow \infty} \frac{I_d(t_d(\tau))}{H_{d,\alpha}} = 1 - \tau \quad \text{where } \tau \in [0, 1], \\ \text{if } \alpha > 1, \quad t_d(\tau) &= \tau, \quad \lim_{d \rightarrow \infty} \frac{I_d(t_d(\tau))}{H_{d,\alpha}} = \frac{B(1 - \frac{1}{\alpha}, 1 + 2t)}{\alpha \zeta(\alpha)} \sim C \frac{1}{\tau^{1-\frac{1}{\alpha}}} \mathcal{L}_d(0), \end{aligned}$$

1001 *Proof.* **For  $\alpha > 1$ .** We use the change of variable  $z = k^{-\alpha}$  to get

$$I_d(t) = \frac{1}{\alpha} \int_{d^{-\alpha}}^1 z^{-\frac{1}{\alpha}} (1-z)^t dz$$

1002 As  $d \rightarrow \infty$ , the integral converges to definition of the Beta function

$$\lim_{d \rightarrow \infty} \alpha I_d(t) = \int_0^1 z^{-\frac{1}{\alpha}} (1-z)^t dz =: B\left(1 - \frac{1}{\alpha}, 1 + t\right).$$

1003 As  $\lim_{d \rightarrow \infty} H_{d,\alpha} = \zeta(\alpha) < \infty$  (Lemma C.3),

$$\lim_{d \rightarrow \infty} \frac{I_d(t)}{H_{d,\alpha}} = \frac{B(1 - \frac{1}{\alpha}, 1 + t)}{\alpha \zeta(\alpha)}.$$

1004 As it is not easy to intuit the rate from the Beta function, we give an additional asymptotic equivalence  
 1005 for large  $t$ . Using Stirling's formula, the Beta function behaves as

$$B\left(1 - \frac{1}{\alpha}, 1 + t\right) \sim \Gamma\left(1 - \frac{1}{\alpha}\right) \frac{1}{t^{1-\frac{1}{\alpha}}}.$$

1006 **For  $\alpha < 1$**  we use the change of variable  $z = tk^{-\alpha}$  to get

$$I_d(t) = \frac{1}{\alpha} t^{\frac{1}{\alpha}-1} \int_{td^{-\alpha}}^t z^{-\frac{1}{\alpha}} \left(1 - \frac{z}{t}\right)^t dz.$$

1007 To have a well-defined integral, we need to introduce the scaling  $t_d(\tau) = \tau d^\alpha$ ,

$$I_d(\tau d^\alpha) = \frac{1}{\alpha} d^{1-\alpha} \tau^{\frac{1}{\alpha}-1} \int_\tau^{\tau d^\alpha} z^{-\frac{1}{\alpha}} \left(1 - \frac{z}{\tau d^\alpha}\right)^{\tau d^\alpha} dz.$$

1008 The factor of  $d^{1-\alpha}$  will cancel out with the normalizer as  $H_{d,\alpha} = \Theta(d^{1-\alpha})$  (Lemma C.3). The  
 1009 remaining integral should simplify for large  $d$ , as  $(1 - z/\tau d^\alpha)^{\tau d^\alpha} \approx e^{-z}$ , and converge to

$$\lim_{d \rightarrow \infty} \tau^{\frac{1}{\alpha}-1} \int_\tau^{\tau d^\alpha} z^{-\frac{1}{\alpha}} \left(1 - \frac{z}{\tau d^\alpha}\right)^{\tau d^\alpha} dz = \tau^{\frac{1}{\alpha}-1} \int_\tau^\infty z^{-\frac{1}{\alpha}} e^{-z} dz = E_{\frac{1}{\alpha}}(\tau),$$

1010 where  $E_p$  is the generalized exponential integral. To swap the limit and integral, we can verify that  
 1011 the dominated convergence theorem applies. The integral can be written as

$$\int_\tau^{\tau d^\alpha} z^{-\frac{1}{\alpha}} \left(1 - \frac{z}{\tau d^\alpha}\right)^{\tau d^\alpha} dz = \int_\tau^\infty a(z, d) dz \quad \text{where } a(z, d) := \mathbb{1}_{\{z \leq \tau d^\alpha\}} z^{-\frac{1}{\alpha}} \left(1 - \frac{z}{\tau d^\alpha}\right)^{\tau d^\alpha}.$$

1012 The integrand  $a(z, d)$  converges pointwise to  $f(z) = z^{-\frac{1}{\alpha}} e^{-z}$  and is dominated by  $f$  which is  
 1013 integrable as  $\int_\tau^\infty f(z) dz = \tau^{1-\frac{1}{\alpha}} E_{\frac{1}{\alpha}}(\tau)$ . Combined with the fact that  $H_{d,\alpha} \sim d^{1-\alpha}/(1-\alpha)$ , we get

$$\lim_{d \rightarrow \infty} \frac{I_d(\tau d^\alpha)}{H_{d,\alpha}} = \frac{1-\alpha}{\alpha} E_{\frac{1}{\alpha}}(\tau).$$

1014 To simplify for large  $\tau$  and obtain  $E_{1/\alpha}(\tau) \sim e^{-\tau}/\tau$ , we use the fact that the generalized exponential  
 1015 integral  $E_p(z)$  in decreasing in  $p$ , meaning that  $E_{\lfloor 1/\alpha \rfloor}(\tau) > E_{1/\alpha}(\tau) > E_{\lceil 1/\alpha \rceil}(\tau)$ , and that for  
 1016 integer values of  $p$  we have  $e^{-\tau}/\tau + n \leq E_n(\tau) \leq e^{-\tau}/\tau + n - 1$  (DLMF, §8.19(ix)). Both bounds are  
 1017 asymptotically equivalent to  $e^{-\tau}/(\tau + 1)$ .

1018 **For**  $\alpha = 1$  we use the change of variable  $k = d^z$  or  $z = \log_d(k)$  to get

$$I_d(t) = \log(d) \int_0^1 (1 - d^{-z})^t dz.$$

1019 The normalizer scales as  $H_{d,\alpha} \stackrel{d}{\sim} \log(d)$  ([Lemma C.3](#)) so only the integral remains. To make  
1020 meaningful progress, we introduce the scaling  $t_d(\tau) = d^\tau$  for  $\tau \in [0, 1]$ ,

$$\frac{I_d(d^\tau)}{\log(d)} = \int_0^1 \left(1 - \frac{d^{\tau-z}}{d^\tau}\right)^{d^\tau} dz.$$

1021 As  $d \rightarrow \infty$ , the integrand converges to 0 if  $z \in (0, s)$  and to 1 if  $z \in (s, 1)$ , and is dominated by  
1022  $f(x) = 1$  so by the DCT we can swap the limit and integral to get

$$\lim_{d \rightarrow \infty} \frac{I_d(d^\tau)}{H_{d,\alpha}} = \lim_{d \rightarrow \infty} \int_0^1 \left(1 - \frac{d^{\tau-z}}{d^\tau}\right)^{d^\tau} dz = \int_0^\tau 0 dz + \int_\tau^1 1 dz = 1 - \tau. \quad \square$$

1023 **Lemma C.6** (Approximation error is negligible). *Let  $\delta_d(t)$  be the upper bound on the approximation*  
1024 *error derived in the [Approximation Error Lemma \(C.4\)](#). We have that*

$$\lim_{d \rightarrow \infty} \frac{\delta_d(t_d(\tau))}{I_d(t_d(\tau))} = 0 \text{ if } \alpha \leq 1, \quad \text{and} \quad \lim_{\tau \rightarrow \infty} \lim_{d \rightarrow \infty} \frac{\delta_d(t)}{I_d(t)} = 0 \text{ if } \alpha > 1.$$

1025 *Proof.* Recall that the bound approximation error  $\delta$  in [Approximation Error Lemma \(C.4\)](#) is

$$|S_d(t) - I_d(t)| \leq \delta_d(t) \quad \text{where} \quad \delta_d(t) := \begin{cases} \frac{1}{1+t} \left(1 - \frac{1}{1+t}\right)^t & \text{if } 1+t \leq d^\alpha, \\ \frac{1}{d^\alpha} \left(1 - \frac{1}{d^\alpha}\right)^t & \text{if } 1+t \geq d^\alpha. \end{cases}$$

1026 **For**  $\alpha > 1$ ,  $t$  does not scale with  $d$  so we are in the small  $t$  regime,  $1+t \leq d^\alpha$ . In this regime,

$$\delta_d(t) = \frac{1}{t+1} \left(1 - \frac{1}{t+1}\right)^t \leq \frac{1}{t+1}.$$

1027 The error  $\delta_d(t)$  does not vanish with  $d$ , but it goes down as  $O(1/t)$ . As the integral  $I_d(t)$  is of order  
1028  $\Theta(1/t^{1-\frac{1}{\alpha}})$ , the relative error is of order  $O(1/t^{\frac{1}{\alpha}})$ , and vanishes for large  $t$ .

1029 **For**  $\alpha < 1$ , we scale  $t$  with  $d$  as  $t = \tau d^\alpha$ . Whether  $t$  is small or large depends on  $\tau$ . If  $\tau < 1$ , we are  
1030 in the small  $t$  regime as  $1 + \tau d^\alpha \leq d^\alpha$  and

$$\delta_d(\tau d^\alpha) = \frac{1}{\tau d^\alpha + 1} \left(1 - \frac{1}{\tau d^\alpha + 1}\right)^{\tau d^\alpha} \leq \frac{1}{\tau d^\alpha}.$$

1031 If  $\tau \geq 1$  we are in the large  $t$  regime and

$$\delta_d(\tau d^\alpha) = \frac{1}{d^\alpha} \left(1 - \frac{1}{d^\alpha}\right)^{\tau d^\alpha} \leq \frac{1}{d^\alpha}.$$

1032 In both cases  $\lim_{d \rightarrow \infty} \delta_d(\tau d^\alpha) \rightarrow 0$  and the relative error also vanishes.

1033 **For**  $\alpha = 1$  we scale  $t$  with  $d$  as  $t = d^\tau$  for  $\tau \in [0, 1]$ . Taking  $d \rightarrow \infty$  puts us in the small  $t$   
1034 regime,  $1+t = 1+d^\tau \leq d$ . In this regime,

$$\delta_d(d^\tau) = \frac{1}{d^\tau + 1} \left(1 - \frac{1}{d^\tau + 1}\right)^{d^\tau} \leq \frac{1}{d^\tau},$$

1035 which also vanishes with  $d$ .  $\square$

## D Proofs for sign descent

This section gives the derivation for the scaling of time and the step-size for sign descent given in Definition 4.4 and the resulting asymptotic convergence rates of Theorem 4.5. Each result start from the relative loss defined as follows.

**Definition D.1** (Normalized loss for sign descent). *Let  $\mathcal{L}_d(t, \eta)$  be the loss after with step-size  $\eta$  as defined in Proposition 4.2, and  $\eta(T, \phi) = 1/H_{d,\alpha} T \phi^\alpha$  be the reparameterization of the step-size derived from Proposition 4.3. The relative loss after  $T$  steps of the simplified sign descent dynamics on Problem 2.1 with power-law frequencies as in Assumption 2.3 is*

$$r_d(T, \phi) := \frac{\mathcal{L}_d(T, \eta(T, \phi)) - \mathcal{L}_d^*}{\mathcal{L}_d(0) - \mathcal{L}_d^*} = \frac{H_{\lfloor \phi \rfloor, 2\alpha} - 2H_{\lfloor \phi \rfloor, \alpha} \phi^{-\alpha} + \lfloor \phi \rfloor \phi^{-2\alpha} + \frac{d - \lfloor \phi \rfloor}{4T^2} \phi^{-2\alpha}}{H_{d, 2\alpha}},$$

where  $H_{n,p} = \sum_{k=1}^n k^{-p}$ .

*Proof.* Starting from Proposition 4.2 and using the fact that, if  $\phi \in [1, d]$ , the number of components in the decreasing phase of the simplified sign descent dynamics is  $\lfloor \phi \rfloor$ , we expand the square and replacing the sums by  $H_{n,p}$ ,

$$\begin{aligned} r_d(T, \phi) &= \frac{\sum_{k=1}^{\lfloor \phi \rfloor} (k^{-\alpha} - \phi^{-\alpha})^2 + \sum_{k=\lfloor \phi \rfloor+1}^d \left( \frac{1}{2T\phi^\alpha} \right)^2}{\sum_{k=1}^d k^{-2\alpha}}, \\ &= \frac{\left( \sum_{k=1}^{\lfloor \phi \rfloor} k^{-2\alpha} - 2k^{-\alpha} \phi^{-\alpha} + \phi^{-2\alpha} \right) + \frac{d - \lfloor \phi \rfloor}{4T^2} \phi^{-2\alpha}}{\sum_{k=1}^d k^{-2\alpha}}, \\ &= \frac{H_{\lfloor \phi \rfloor, 2\alpha} - 2H_{\lfloor \phi \rfloor, \alpha} \phi^{-\alpha} + \lfloor \phi \rfloor \phi^{-2\alpha} + \frac{d - \lfloor \phi \rfloor}{4T^2} \phi^{-2\alpha}}{H_{d, 2\alpha}}. \end{aligned}$$

□

Our rates are given for a choice of scaling of the step-size  $\phi_d(\tau)$  and time  $T_d(\tau)$ , as

$$r(\tau) := \lim_{d \rightarrow \infty} r_d(T_d(\tau), \phi_d(\tau)).$$

### D.1 Scaling of sign descent for $\alpha = 1/2$

**Proposition D.2.** *For the relative loss defined in Definition D.1, if  $\alpha = 1/2$ , the scalings*

$$T_d(\tau) = \frac{1}{2} d^{\frac{1}{2}\tau}, \quad \phi_d(\tau) = d^{1-\tau},$$

are obtained by setting  $\phi_d(\tau) = d^{x_*(\tau)}$  where  $x_*(\tau)$  is the solution to

$$x_*(\tau) = \arg \min_{0 < x \leq 1} \lim_{d \rightarrow \infty} r_d(T_d(\tau), d^x).$$

These choices result in the scaling  $r(\tau) = 1 - \tau$ .

*Proof.* We start from the normalized loss given  $\phi$ ,

$$r_d(T, \phi) = \frac{H_{\lfloor \phi \rfloor, 1} - 2H_{\lfloor \phi \rfloor, \frac{1}{2}} \phi^{-\frac{1}{2}} + \lfloor \phi \rfloor \phi^{-1} + \frac{d}{4T^2} \phi^{-1} - \frac{1}{4T^2} \lfloor \phi \rfloor \phi^{-1}}{H_{d, 1}}.$$

Taking  $4T^2 = d^\tau$  and  $\phi = d^{1-\tau}$ , most terms vanish as  $d \rightarrow \infty$  as  $H_{n, \frac{1}{2}} \sim 2\sqrt{n}$ ,  $H_{n, 1} \sim \log(n)$ , and

$$\frac{2H_{\lfloor d^{1-\tau} \rfloor, \frac{1}{2}} d^{-\frac{1-\tau}{2}}}{H_{d, 1}}, \frac{\lfloor d^{1-\tau} \rfloor d^{-(1-\tau)}}{H_{d, 1}}, \frac{1}{H_{d, 1}}, \frac{\lfloor d^{1-\tau} \rfloor d^{-1}}{H_{d, 1}} \text{ are all } \Theta\left(\frac{1}{\log(d)}\right) \text{ and converge to 0.}$$

The first term is the only one remaining, and gives the scaling

$$\lim_{d \rightarrow \infty} r_d(T(d, \tau), d^x) = \lim_{d \rightarrow \infty} \frac{H_{\lfloor d^{1-\tau} \rfloor, 1}}{H_{d, 1}} = \lim_{d \rightarrow \infty} \begin{cases} x & \text{if } 1 - \tau \leq x, \\ \infty & \text{otherwise.} \end{cases}$$

The optimum is at  $x_*(\tau) = 1 - \tau$  and gives  $r(\tau) = \lim_{d \rightarrow \infty} r_d(T(d, \tau), d^{1-\tau}) = 1 - \tau$ . □



1057 **D.2 Scaling of sign descent for  $\alpha < 1/2$**

1058 **Proposition D.3.** For the relative loss defined in [Definition D.1](#), if  $\alpha < 1/2$ , the scalings

$$T_d(\tau) = \tau, \quad \phi_d(\tau) = \begin{cases} d & \text{if } \tau \leq \sqrt{\frac{1-c_1}{4c_2}}, \\ d(c_1 + c_2 4\tau^2)^{-1} & \text{otherwise,} \end{cases}$$

1059 where  $c_1 = 1 - \frac{1}{2\alpha}$  and  $c_2 = \frac{\alpha}{\alpha-1}$ , are obtained by setting  $\phi_d(\tau) = dx_*(\tau)$  where

$$x_*(\tau) = \arg \min_{0 < x \leq 1} \lim_{d \rightarrow \infty} r_d(T_d(\tau), dx).$$

1060 These choices result in the scaling

$$r(\tau) = \begin{cases} \frac{2\alpha c_2}{(c_1 + c_2 4\tau^2)^{2\alpha}} & \text{if } \tau \leq \sqrt{\frac{1-c_1}{4c_2}} \\ \text{otherwise} & \end{cases} \sim c_2^{2\alpha} \frac{1}{(2\tau)^{2-4\alpha}}.$$

1061 *Proof.* Substituting  $\phi = dx$ , taking the limit as  $d \rightarrow \infty$ , and using that  $H_{d,p} \sim \frac{d^{1-p}}{1-p}$  for  $p < 1$ ,  
1062 define  $f_\tau(x)$  as the limit of  $r_d(\tau, dx)$  as  $d$  grows,

$$\begin{aligned} f_\tau(x) &= \lim_{d \rightarrow \infty} r_d(\tau, dx) = \lim_{d \rightarrow \infty} \frac{H_{\lfloor dx \rfloor, 2\alpha} - 2H_{\lfloor dx \rfloor, \alpha}(dx)^{-\alpha} + \lfloor dx \rfloor (dx)^{-2\alpha} + \frac{d - \lfloor dx \rfloor}{4\tau^2} (dx)^{-2\alpha}}{H_{d, 2\alpha}}, \\ &= \frac{\frac{1}{1-2\alpha} x^{1-2\alpha} - 2\frac{1}{1-\alpha} x^{1-2\alpha} + x^{1-2\alpha} + \frac{1}{4\tau^2} x^{-2\alpha} - \frac{1}{4\tau^2} x^{1-2\alpha}}{\frac{1}{1-2\alpha}}. \end{aligned}$$

1063 We will show that our choice of step-size corresponds to taking  $r(\tau) = \min_{0 < x \leq 1} f_\tau(x)$ . Gathering  
1064 terms,  $f_\tau(x)$  is proportional to the following polynomial

$$f_\tau(x) \propto x^{1-2\alpha} \left( 1 + \frac{1}{1-2\alpha} - 2\frac{1}{1-\alpha} - \frac{1}{4\tau^2} \right) + \frac{1}{4\tau^2} x^{-2\alpha},$$

1065 which has a unique stationary point at

$$x_{\text{stat}}(\tau) = \frac{2\alpha}{4\tau^2} \frac{1}{(1-2\alpha) \left( 1 + \frac{1}{1-2\alpha} - 2\frac{1}{1-\alpha} - \frac{1}{4\tau^2} \right)} = \left( 1 - \frac{1}{2\alpha} + \frac{\alpha}{1-\alpha} 4\tau^2 \right)^{-1}.$$

1066 If  $x_{\text{stat}}(\tau) \notin [0, 1]$ ,  $f_\tau(x)$  must be decreasing over  $[0, 1]$  as  $\lim_{x \rightarrow 0} f_\tau(x) = \infty$  and  $r_\tau(1)$  is finite,  
1067 and the minimum must be at 1. If the stationary point is in  $(0, 1]$ , it must be the minimum. This gives

$$x_* = \arg \min_{0 < x \leq 1} f_\tau(x) = \begin{cases} x_{\text{stat}} & \text{if } 0 < x_{\text{stat}} \leq 1, \\ 1 & \text{otherwise.} \end{cases}$$

1068 and  $0 < x_{\text{stat}}(\tau) \leq 1$  is equivalent to  $\tau \geq \frac{1}{2} \sqrt{\frac{1-\alpha}{2\alpha^2}}$ . If  $\tau \geq \frac{1}{2} \sqrt{\frac{1-\alpha}{2\alpha^2}}$  and  $x_*(\tau) = 1$ , we get

$$f_\tau(x_*(\tau)) = 1 - 2\frac{1-2\alpha}{1-\alpha} + (1-2\alpha) = 2\frac{\alpha^2}{1-\alpha}.$$

1069 If  $\tau < \frac{1}{2} \sqrt{\frac{1-\alpha}{2\alpha^2}}$  and  $x_*(\tau) = \left( 1 - \frac{1}{2\alpha} + \frac{\alpha}{1-\alpha} 4\tau^2 \right)^{-1}$  we get

$$\begin{aligned} f_\tau(x_*(\tau)) &= (1-2\alpha) \left( x^{1-2\alpha} \left( 1 + \frac{1}{1-2\alpha} - 2\frac{1}{1-\alpha} - \frac{1}{4\tau^2} \right) + \frac{1}{4\tau^2} x^{-2\alpha} \right), \\ &= \frac{\left( 1 - \frac{1}{2\alpha} + \frac{\alpha}{1-\alpha} 4\tau^2 \right)^{2\alpha}}{4\tau^2}, \end{aligned}$$

1070 which can be simplified for large  $\tau$  as  $f_\tau(x_*(\tau)) \sim \left( \frac{\alpha}{1-\alpha} \right)^{2\alpha} \frac{1}{(2\tau)^{2-4\alpha}}$ . □

### 1071 D.3 Scaling of sign descent for $\alpha > 1/2$

1072 For  $\alpha > 1/2$ , the expression for the loss does not simply as  $d \rightarrow \infty$ . The conditional frequencies  
 1073 decay fast, meaning that most of the loss comes from the few high-frequency words. As a result, we  
 1074 cannot define the scaling of the step-size as the minimization problem for the optimal scaling in the  
 1075 limit  $d \rightarrow \infty$ . Instead, we use the fact that the (normalized) loss can not converge to 0 unless all  
 1076 components enter the oscillatory regime, at which point we can compute an optimal step-size.

1077 **Proposition D.4.** *For the relative loss defined in Definition D.1, if  $\alpha > 1/2$  and  $4T^2 \geq \frac{d-1}{2\alpha-1}$ , the*  
 1078 *optimal-step size is given by*

$$\phi_*(d, T) = \arg \min_{\phi} r_d(T, \phi) = \left(1 + \frac{d-1}{4T^2}\right)^{1/\alpha}.$$

1079 This gives the following scaling for  $\tau^2 > 1/(2\alpha-1)$

$$T_d(\tau) = \tau^{1/2} \sqrt{d}, \quad \phi(\tau) = \left(1 + \frac{1}{\tau^2}\right)^{1/\alpha}, \quad r(\tau) = \frac{1}{\zeta(2\alpha)} \frac{1}{1 + \tau^2}.$$

1080 *Proof.* If  $\phi \geq 2$ , the normalized loss is lower-bounded by the error on the first two components,

$$r_d(T, \eta(T, \phi)) = \frac{\sum_{k=1}^{\lfloor \phi \rfloor} (k^{-\alpha} - \phi^{-\alpha})^2 + \sum_{k=\lfloor \phi \rfloor+1}^d \left(\frac{1}{2T\phi^\alpha}\right)^2}{H_{d, 2\alpha}}.$$

1081 This is lower-bounded by a constant  $C > 0$  independently of  $T$ , and implies that we cannot make  
 1082 progress by running longer unless  $\phi < 2$ . If only the first component is oscillating, the optimal  $\phi$  is

$$\phi_*(d, T) = \arg \min_{\phi} r_d(T, \eta(T, \phi)) = \arg \min_{\phi} (1 - \phi^{-\alpha})^2 + \frac{d-1}{4T^2} \phi^{-2\alpha} = \left(1 + \frac{d-1}{4T^2}\right)^{1/\alpha}.$$

1083 To be consistent with only having two components oscillating, this requires  $\phi_*(d, T) \leq 2$ , giv-  
 1084 ing the constraint that this only holds when  $(1 + \frac{d-1}{4T^2})^{1/\alpha} \leq 2$  or  $4T^2 \geq \frac{d-1}{2\alpha-1}$ . Taking the scal-  
 1085 ing  $4T_d(\tau)^2 = \tau^2 d$  gives the limit

$$\phi(\tau) = \lim_{d \rightarrow \infty} \phi_*(d, T_d(\tau)) = \left(1 + \frac{1}{\tau^2}\right)^{1/\alpha} \quad \text{if } \tau^2 > \frac{1}{2\alpha-1},$$

1086 and the asymptotic loss

$$\begin{aligned} \lim_{d \rightarrow \infty} r_d(T_d(\tau, d), \phi(\tau)) &= \frac{(1 - \phi(\tau)^{-\alpha})^2 + \frac{1}{\tau^2} \phi(\tau)^{-2\alpha}}{\zeta(2\alpha)}, \\ &= \frac{\left(1 - \left(1 + \frac{1}{\tau^2}\right)^{-1}\right)^2 + \frac{1}{\tau^2} \left(1 + \frac{1}{\tau^2}\right)^{-2}}{\zeta(2\alpha)} = \frac{1}{1 + \tau^2} \frac{1}{\zeta(2\alpha)}, \end{aligned}$$

1087 where  $H_{d, 2\alpha} \stackrel{d}{\sim} \zeta(2\alpha)$ , the Riemann zeta function.  $\square$

1088 **Proposition D.4** and **Theorem 4.5** only gives guarantees for the regime  $\tau^2 > 1/(2\alpha-1)$ . The extension  
 1089 of the scalings to the regime  $\tau^2 \leq 1/(2\alpha-1)$  was decided arbitrarily to fit empirical data. To fit the  
 1090 empirical data when both  $\tau$  and  $\alpha$  are small ( $\alpha \leq 1$ ), the asymptotic scaling presented  
 1091 in **Theorem 4.5** uses the following step-size scaling

$$\tilde{\phi}(\tau) = \begin{cases} \left(1 + \frac{1}{\tau^2}\right) & \text{if } \tau^2 < (2\alpha-1)^{-1} \text{ and } \alpha < 1, \\ \left(1 + \frac{1}{\tau^2}\right)^{1/\alpha} & \text{otherwise,} \end{cases} \quad \text{instead of } \left(1 + \frac{1}{\tau^2}\right).$$

1092 and the following approximation for the loss,

$$r_d(T_d(\tau, d), \phi(\tau)) \stackrel{\tau, d}{\sim} \frac{1}{1 + \zeta(2\alpha)\tau^2} \quad \text{instead of} \quad \frac{1}{1 + \tau^2} \frac{1}{\zeta(2\alpha)}.$$

1093 Both expressions are asymptotically equivalent as  $d \rightarrow \infty$  and  $\tau \rightarrow \infty$ , but the above proposals  
 1094 (given in **Definition 4.4**) fit the observed best step-size and loss scalings better.

## E Scaling as a function of desired relative error

This section derives the results of [Theorem 1.1](#), showing how the number of iterations should scale as a function of  $d$  and the desired relative error  $\varepsilon$ . The main theorems ([Theorems 3.1](#) and [4.5](#)) give the error  $\varepsilon$  as a function of the rescaled time  $t_d(\tau)$ , this section gives the inversion.

**Note:** The current statement regarding the meaning of  $\approx$  is inaccurate due to the typo in [Theorem 3.1](#) discussed in [Appendix C.2](#). We will change the following

[By]  $t \approx f(d, \varepsilon)$ , we mean that there exists a constant  $c \in [a, b]$  where  $a, b$  are constants depending on  $\alpha$  but not on  $d$  or  $\varepsilon$  such that if  $t(d, \alpha) = cf(d, \alpha) + O(\log \log(1/\varepsilon))$ ,

$$\lim_{d \rightarrow \infty} \frac{\mathcal{L}_d(t(d, \alpha)) - \mathcal{L}_d^*}{\mathcal{L}_d(0) - \mathcal{L}_d^*} = \varepsilon.$$

to instead read

[By]  $t \approx f(d, \varepsilon)$ , we mean that for some function  $t(d, \varepsilon) = \tilde{\Theta}(f(d, \varepsilon))$  where  $\tilde{\Theta}$  ignores  $\log \log(1/\varepsilon)$  terms and constants that depend on  $\alpha$  but not on  $\varepsilon$  or  $d$ , we have

$$\lim_{\varepsilon \rightarrow 0} \lim_{d \rightarrow \infty} \frac{\mathcal{L}_d(t(d, \alpha)) - \mathcal{L}_d^*}{\mathcal{L}_d(0) - \mathcal{L}_d^*} \frac{1}{\varepsilon} = 1.$$

**Proposition E.1** (Formal version of [Theorem 1.1](#) for gradient descent). *To reach a relative loss of  $\varepsilon$  using gradient descent ([Theorem 3.1](#)),  $t$  needs to scale with  $d$  as follows.*

$$\begin{aligned} \text{If } \alpha < 1, & \quad t_d(\varepsilon) = d^\alpha \tilde{\Theta}(\log(1/\varepsilon)), \\ \text{if } \alpha = 1, & \quad t_d(\varepsilon) = d^{1-\varepsilon}, \\ \text{if } \alpha > 1, & \quad t_d(\varepsilon) = (C/\varepsilon)^{\frac{\alpha}{\alpha-1}} \text{ where } C = \frac{\Gamma(1-\frac{1}{\alpha})}{\alpha \zeta(2\alpha)}. \end{aligned}$$

With those scalings, we have that  $\lim_{d \rightarrow \infty} r_d(t_d(\varepsilon)) = \varepsilon$  where  $r_d(t)$  is the relative loss defined in [Proposition A.1](#), or  $\lim_{\varepsilon \rightarrow 0} \lim_{d \rightarrow \infty} r_d(t_d(\varepsilon))/\varepsilon = 1$  in the case  $\alpha > 1$ .

*Proof.* For  $\alpha = 1$ , [Theorem 3.1](#) shows that

$$r(\tau) := \lim_{d \rightarrow \infty} \frac{\mathcal{L}_d(t_d(\tau)) - \mathcal{L}_d^*}{\mathcal{L}_d(0) - \mathcal{L}_d^*} = 1 - \tau \text{ with } t_d(\tau) = d^\tau \implies \lim_{d \rightarrow \infty} \frac{\mathcal{L}_d(d^{1-\varepsilon}) - \mathcal{L}_d^*}{\mathcal{L}_d(0) - \mathcal{L}_d^*} = \varepsilon.$$

For  $\alpha > 1$ , we know that  $r(\tau) \sim C/\tau^{1-\frac{1}{\alpha}}$ . Letting  $\tau(\varepsilon) = (C/\varepsilon)^{\frac{\alpha}{\alpha-1}}$  gives that  $r(1/\varepsilon) \sim \varepsilon$  as

$$\lim_{\tau \rightarrow \infty} \lim_{d \rightarrow \infty} r_d(\tau) \frac{1}{C} \tau^{\frac{1-\alpha}{\alpha}} = 1 \implies \lim_{\varepsilon \rightarrow 0} \lim_{d \rightarrow \infty} r_d(1/\varepsilon) \frac{1}{C} \left( (C/\varepsilon)^{\frac{\alpha}{\alpha-1}} \right)^{\frac{1-\alpha}{\alpha}} = \lim_{\varepsilon \rightarrow 0} \lim_{d \rightarrow \infty} r_d(1/\varepsilon) \varepsilon = 1.$$

For  $\alpha < 1$  We have that  $\lim_{d \rightarrow \infty} r_d(\frac{1}{2} \tau d^\alpha) = \frac{1-\alpha}{\alpha} E_{\frac{1}{\alpha}}(\tau)$ . The exact solution is

$$\tau(\varepsilon) = E_{\frac{1}{\alpha}}^{-1} \left( \frac{\alpha}{1-\alpha} \varepsilon \right),$$

where  $E_{1/\alpha}^{-1}$  is the inverse of the generalized exponential integral. To get an idea of its growth, we show  $\tau(\varepsilon) = \tilde{\Theta}(\log(1/\varepsilon))$  by showing that for small enough  $\varepsilon$ ,

$$-\log \log \left( \frac{1-\alpha}{\alpha} \frac{1}{\varepsilon} \right) - \left\lceil \frac{1}{\alpha} \right\rceil \leq \tau(\varepsilon) - \log \left( \frac{1-\alpha}{\alpha} \frac{1}{\varepsilon} \right) \leq 0 \text{ if } \varepsilon \leq \min \left\{ e^{2-\lfloor \frac{1}{\alpha} \rfloor}, \frac{W(6)}{6} \right\} \frac{1-\alpha}{\alpha}.$$

To show that  $\tau(\varepsilon)$  must be within that interval, we first derive an interval on  $\varepsilon$  as a function of  $\tau$  using the same bounds on the generalized exponential integral as in [Lemma C.5](#),

$$E_{\lceil \frac{1}{\alpha} \rceil}(\tau) \leq E_{\frac{1}{\alpha}}(\tau) \leq E_{\lfloor \frac{1}{\alpha} \rfloor}(\tau) \quad \text{and} \quad \frac{e^{-\tau}}{\tau + n} \leq E_n(\tau) \leq \frac{e^{-\tau}}{\tau + n - 1} \text{ for } n \in \mathbb{N}.$$

1111 Combining both bounds gives the range

$$a(\tau) := \frac{1-\alpha}{\alpha} \frac{e^{-\tau}}{\tau + \lceil \frac{1}{\alpha} \rceil} \leq \varepsilon \leq \frac{1-\alpha}{\alpha} \frac{e^{-\tau}}{\tau + \lfloor \frac{1}{\alpha} \rfloor - 1} =: b(\tau).$$

1112 We will show that using  $\tau_+$  excludes  $\varepsilon$  from the interval from the right,  $b(\tau_+(\varepsilon)) < \tau$ , and that  $\tau_-$   
 1113 excludes  $\varepsilon$  from the left,  $\varepsilon < a(\tau_-(\varepsilon))$ , if  $\varepsilon$  is sufficiently small. As both bounds decrease with  $\tau$ ,  
 1114 this gives that  $\tau(\varepsilon)$  must increase grow faster than  $\tau_-(\varepsilon)$  but slower than  $\tau_+(\varepsilon)$ .

1115 For the upper bound, we show that  $b(\tau_+(\varepsilon)) < \varepsilon$  is  $\varepsilon$  is small enough.

$$b(\tau_+(\varepsilon)) = \frac{1-\alpha}{\alpha} \frac{e^{\log(\frac{1-\alpha}{1-\alpha}\varepsilon)}}{\log(\frac{1-\alpha}{\alpha}\frac{1}{\varepsilon}) + \lfloor \frac{1}{\alpha} \rfloor - 1} = \frac{\varepsilon}{\log(\frac{1-\alpha}{\alpha}\frac{1}{\varepsilon}) + \lfloor \frac{1}{\alpha} \rfloor - 1}.$$

1116 This bound is smaller than  $\varepsilon$  for small enough  $\varepsilon$ , as

$$\log\left(\frac{1-\alpha}{\alpha}\frac{1}{\varepsilon}\right) + \left\lfloor \frac{1}{\alpha} \right\rfloor - 1 > 1 \equiv \frac{1-\alpha}{\alpha} \frac{1}{\varepsilon} > e^{2-\lfloor \frac{1}{\alpha} \rfloor} \equiv \varepsilon < e^{2-\lfloor \frac{1}{\alpha} \rfloor} \frac{1-\alpha}{\alpha}.$$

1117 For the lower-bound, we show that  $a(\tau_-(\varepsilon)) > \varepsilon$  is  $\varepsilon$  is small enough. We have

$$a(\tau_-(\varepsilon)) = \varepsilon \frac{\log(\frac{1-\alpha}{\alpha}\frac{1}{\varepsilon})e^{\lceil \frac{1}{\alpha} \rceil}}{\log(\frac{1-\alpha}{\alpha}\frac{1}{\varepsilon}) - \log \log(\frac{1-\alpha}{\alpha}\frac{1}{\varepsilon})},$$

1118 and need to show that for a small enough  $\varepsilon$ ,

$$\frac{\log(\frac{1-\alpha}{\alpha}\frac{1}{\varepsilon})e^{\lceil \frac{1}{\alpha} \rceil}}{\log(\frac{1-\alpha}{\alpha}\frac{1}{\varepsilon}) - \log \log(\frac{1-\alpha}{\alpha}\frac{1}{\varepsilon})} \geq \frac{\log(y)7}{\log(y) - \log \log(y)} > 1, \text{ where } y = \frac{1-\alpha}{\alpha} \frac{1}{\varepsilon},$$

1119 where we used that  $\lceil 1/\alpha \rceil \geq 2$  and  $e^2 \geq 7$ . We get that  $7 \log(y) > \log(y) - \log \log(y) \equiv y^6 \log(y) >$   
 1120 1, holds for all  $y > C$  where  $C = e^{W(6)/6} = 1.2696\dots$  where  $W$  is the Lambert  $W$  function (DLMF,  
 1121 §4.13) or in terms of  $\varepsilon$ ,

$$\frac{1-\alpha}{\alpha} \frac{1}{\varepsilon} > C \equiv \varepsilon < \frac{1}{C} \frac{1-\alpha}{\alpha}. \quad \square$$

1122 **Proposition E.2** (Formal version of [Theorem 1.1](#) for sign descent). *To reach a relative loss of  $\varepsilon$  using*  
 1123 *sign descent ([Theorem 4.5](#)),  $t$  needs to scale with  $d$  as follows.*

$$\begin{aligned} \text{If } \alpha < 1/2, & \quad t_d(\varepsilon) = \frac{1}{2}(c_2)^{\frac{\alpha}{1-2\alpha}} (1/\varepsilon)^{\frac{1}{2-4\alpha}}, \\ \text{if } \alpha = 1/2, & \quad t_d(\varepsilon) = \frac{1}{2}d^{\frac{1}{2}(1-\varepsilon)}, \\ \text{if } \alpha > 1/2, & \quad t_d(\varepsilon) = \frac{1}{2} \left( \frac{d(1/\varepsilon - 1)}{\zeta(2\alpha)} \right)^{1/2}. \end{aligned}$$

1124 *With those scalings, we have that  $\lim_{d \rightarrow \infty} r_d(t_d(\varepsilon), \phi_d(\varepsilon)) = \varepsilon$  for some choice of step-size  $\phi_d(\varepsilon)$*   
 1125 *where  $r_d(t, \phi)$  is the relative loss defined in [Proposition A.2](#).*

1126 *Proof.* For  $\alpha = 1/2$ , [Proposition D.2](#) shows the following asymptotic rate with the scaling  $T_d(\tau) =$   
 1127  $\frac{1}{2}d^{\frac{1}{2}\tau}$  and the proper choice of step-size  $\phi_d(\tau)$ . Substituting  $\tau(\varepsilon) = 1 - \varepsilon$  gives

$$\lim_{d \rightarrow \infty} r_d(T_d(\tau), \phi_d(\tau)) = 1 - \tau \implies \lim_{d \rightarrow \infty} r_d(T_d(1 - \varepsilon), \phi_d(1 - \varepsilon)) = 1 - \varepsilon.$$

1128 Using that  $T_d((1 - \varepsilon)) = \frac{1}{2}d^{\frac{1}{2}(1-\varepsilon)}$  recovers the scaling in  $d$ .

1129 **For**  $\alpha < 1/2$ , [Proposition D.3](#) shows the following asymptotic rate with the proper choice of step-size  
 1130  $\phi_d(\tau)$ , with no scaling in  $d$  for time,  $T_d(\tau) = \tau$ . Substituting  $\tau(\varepsilon) = \frac{1}{2}(c_2^{2\alpha}/\varepsilon)^{\frac{1}{2-4\alpha}}$  yields

$$\begin{aligned} & \lim_{\tau \rightarrow \infty} \lim_{d \rightarrow \infty} r_d(\tau, \phi_d(\tau)) \frac{1}{c_2^{2\alpha}} (2\tau)^{2-4\alpha} = 1, \\ \implies & \lim_{\varepsilon \rightarrow 0} \lim_{d \rightarrow \infty} r_d(\tau(\varepsilon), \phi_d(\tau(\varepsilon))) \frac{1}{c_2^{2\alpha}} (2\tau(\varepsilon))^{2-4\alpha} = \lim_{\varepsilon \rightarrow 0} \lim_{d \rightarrow \infty} r_d(\tau(\varepsilon), \phi_d(\tau(\varepsilon))) \frac{1}{\varepsilon} = 1. \end{aligned}$$

1131 Using that  $T_d(\tau) = \tau$  finishes the proof.

1132 **For**  $\alpha > 1/2$ , [Proposition D.4](#) shows the following asymptotic rate with the scaling  $T_d(\tau) =$   
 1133  $\tau^{\frac{1}{2}} d^{1/2}$  and the proper choice of step-size  $\phi_d(\tau)$ , which is valid for  $\tau^2 > 1/(2^\alpha - 1)$ . Substituting the  
 1134 scaling  $\tau(\varepsilon) = (1/\zeta(2\alpha)(1/\varepsilon - 1))^{1/2}$ ,

$$\begin{aligned} & \lim_{\tau \rightarrow \infty} \lim_{d \rightarrow \infty} r_d(\tau, \phi_d(\tau)) (1 + \zeta(2\alpha)\tau^2) = 1, \\ \implies & \lim_{\tau \rightarrow \infty} \lim_{d \rightarrow \infty} r_d(\tau(\varepsilon), \phi_d(\tau(\varepsilon))) (1 + \zeta(2\alpha)\tau(\varepsilon)^2) = \lim_{\tau \rightarrow \infty} \lim_{d \rightarrow \infty} r_d(\tau(\varepsilon), \phi_d(\tau(\varepsilon))) \frac{1}{\varepsilon} = 1. \end{aligned}$$

1135 Using that  $T_d(\tau(\varepsilon)) = \tau(\varepsilon)^{\frac{1}{2}} d^{\frac{1}{2}}$  finishes the proof. □
